# Supplementary material for: The brown algal mode of tip growth: Keeping stress under control
Source: PLoS Biol. 2019 Jan 14;17(1):e2005258. doi: 10.1371/journal.pbio.2005258 (PMC6347293; doi:10.1371/journal.pbio.2005258)
Supplement: S1 Data — (XLSX) [file pbio.2005258.s015.xlsx]

## Sheet: S_Angle
S1 Data: Angle between growth direction and cell wall
s (µm)	θ (rad)
-4.61653	1.58665
-5.34096	1.51163
8.16265	0.976579
7.62375	1.28368
9.75644	1.73694
6.3249	1.21844
8.36189	1.25763
8.78163	1.12897
4.32533	2.03288
6.46282	1.68518
6.8729	1.22538
3.93694	2.08344
6.20571	1.77266
6.57396	1.00886
-1.64073	1.63498
-4.11693	1.65818
-4.88769	1.74488
-7.0938	1.62198
-7.8256	1.59301
-9.10075	1.99093
-3.5703	1.9839
-4.10671	1.13296
-2.5763	0.957779
-3.84237	1.63323
-4.53189	1.91382
-1.94283	1.51476
-3.14121	1.42789
-3.7963	1.82112
-2.32084	1.65942
-2.84031	1.19044
-0.964263	1.69596
-0.0869133	1.7135
3.33646	1.73238
4.33852	1.58756
-3.44655	1.36808
-4.69903	0.99539
-6.06632	1.51845
-5.1454	1.40688
-6.51001	1.11127
-7.31327	1.1029
-5.75297	1.67656
-5.72508	1.69028
-6.47523	1.16887
-7.82159	1.29803
2.43817	1.53602
3.00047	1.29341
3.42967	1.17826
3.9659	1.11616
3.63726	1.74461
5.19694	1.58597
6.16421	1.20359
4.42399	1.98987
6.06806	1.6334
-0.913577	1.56424
-2.18881	1.67427
-3.01634	1.61174
-3.45492	2.2136
-5.22455	1.82449
-2.38891	2.3115
-6.91482	1.9164
4.88121	2.17925
5.70993	1.85433
6.484	2.39542
0.560241	1.2922
2.47616	1.72943
8.92797	2.80318
-0.729826	1.40118
8.83049	1.90935
-3.24549	1.14802
-2.03578	1.62975
-4.48514	2.18707
-4.89964	2.49857
-9.28733	1.09135
-1.36445	1.70046
-1.57068	2.08647
-1.89054	2.15413
9.23948	1.78657
9.0259	2.27946
7.14042	2.7855
6.83829	2.79136
6.88457	2.65385
6.51879	2.7177
-2.7616	2.11669
1.00127	2.41652
0.561445	2.40672
0.779421	2.33986
3.68337	1.39901
3.96556	1.46766
-5.92265	1.91759
-6.10068	2.74899
-4.78607	1.19107
-5.01435	2.87182
-4.40594	1.73786
-3.95369	1.75044
-3.79034	1.92987
-2.79976	0.516842
9.53102	1.60423
9.44513	1.63407
-4.48459	1.31983
-3.00026	1.5905
-2.55709	1.35899
2.81455	1.36828
3.82725	1.98557
4.60883	2.21547
0.796211	0.79084
1.65406	2.24745
1.81059	2.27854
2.78335	1.05628
-3.79235	1.46363
-2.61167	1.3068
-2.44746	1.54882
-3.05347	0.20883
5.54265	0.119987
-3.80019	2.46628
1.25745	2.84271
3.84378	2.76283
2.00225	2.89277
-3.60421	2.58192
-5.44845	2.31047
-7.15751	2.3148
2.27486	1.83053
6.14614	1.63055
8.31676	1.35738
-1.43723	1.68219
8.74836	1.74859
6.64565	2.25887
0.0678643	2.15648
-3.19362	2.19822
-3.84061	2.13164
-2.95535	1.55456
-2.13839	2.0725
-4.14368	1.90192
-3.52104	1.42272
-4.19019	2.00395
-3.55804	1.35895
-3.06421	1.65388
-5.44135	1.34683
-5.72651	2.39757
-5.79911	1.47133
-6.01634	1.64643
-6.06721	1.64594
-5.99221	1.53966
-6.04341	1.73744
-6.57297	1.69127
-7.0012	1.61949
-7.04081	1.52446
-9.08057	1.52214
-9.03195	0.425739
-8.98339	2.03312
-9.02356	2.29528
-3.33059	1.23492
-3.92324	1.06182
-4.3033	1.76122
-0.296202	1.54799
0.448701	1.43115
0.16932	1.96601
