# Supplementary material for: The brown algal mode of tip growth: Keeping stress under control
Source: PLoS Biol. 2019 Jan 14;17(1):e2005258. doi: 10.1371/journal.pbio.2005258 (PMC6347293; doi:10.1371/journal.pbio.2005258)
Supplement: S5 Data — (XLSX) [file pbio.2005258.s019.xlsx]

## Sheet: AllBootstrapResults
S5 Data: Results of bootstrap analysis
Sample	δmin	δmax	s1/2	σy	Φ	r²
1	0.0319727	0.573657	15.2642	10.7649	0.00239293	0.998004
2	0.0459601	0.576178	14.1975	9.35345	0.00372525	0.994462
3	0.0187727	0.534502	14.0125	8.99234	0.0011876	0.984765
4	0.019355	0.507798	14.1851	8.48502	0.000991902	0.975035
5	0.0466157	0.681992	19.7134	12.4239	0.00430371	0.993925
6	0.0317597	0.625405	17.5452	11.7472	0.00212913	0.994987
7	0.0435714	0.607209	17.6625	12.4617	0.00505389	0.986606
8	0.0220752	0.411479	10.5196	10.1562	0.00118427	0.986831
9	0.0513852	0.715204	21.8663	13.0141	0.00761453	0.986989
10	0.0477467	0.613286	18.6965	12.2862	0.00508297	0.99103
11	0.0397696	0.594907	16.8061	11.4125	0.00295819	0.998792
12	0.0159484	0.476197	12.6092	6.41429	0.00082478	0.965573
13	0.0166751	0.497068	12.3529	6.16982	0.000841223	0.939277
14	0.0209871	0.543574	15.5137	9.83186	0.00110544	0.969418
15	0.0458502	0.679515	19.8486	12.6638	0.00598693	0.968768
16	0.0142949	0.476209	13.6255	8.31139	0.000824648	0.966984
17	0.0504292	0.671896	19.8971	12.1999	0.00620759	0.990187
18	0.0373128	0.642807	19.486	12.6542	0.00260619	0.9934
19	0.022451	0.560639	16.097	10.1992	0.00113964	0.987485
20	0.0364619	0.600059	17.2011	12.1033	0.00305441	0.997483
21	0.0234809	0.564528	16.0154	10.3534	0.00128338	0.970877
22	0.0216089	0.583161	16.1267	10.3274	0.00125055	0.982552
23	0.0423906	0.601681	17.9444	12.494	0.00416887	0.988448
24	0.00862393	0.4302	11.1517	4.38232	0.000462752	0.915712
25	0.00936514	0.335166	7.4706	3.99712	0.000530391	0.920268
26	0.0164519	0.531296	14.0827	8.3309	0.000976334	0.980436
27	0.0497918	0.683588	20.0695	12.7083	0.00664399	0.972711
28	0.0310624	0.582939	17.4316	12.731	0.00229433	0.997271
29	0.035593	0.594223	17.7826	12.6639	0.00270721	0.994266
30	0.0326001	0.536106	14.1634	9.60505	0.00199188	0.993838
31	0.054284	0.657298	19.7194	11.9661	0.00673052	0.991746
32	0.0281992	0.613361	17.6077	12.289	0.00192521	0.995923
33	0.0453995	0.625714	17.2865	10.7985	0.00335285	0.991527
34	0.0187446	0.506629	13.5256	7.99588	0.00099163	0.96308
35	0.0514973	0.655419	18.6161	11.392	0.00538195	0.996558
36	0.0213613	0.525254	14.1863	8.45417	0.00107671	0.96238
37	0.0121455	0.50269	10.1121	3.76843	0.000803861	0.925638
38	0.0260265	0.598549	14.9919	8.65076	0.00140887	0.974139
39	0.0088254	0.480781	13.1094	4.50652	0.000457109	0.910113
40	0.0299936	0.561432	16.0485	11.5747	0.00206816	0.997897
41	0.0386932	0.587869	16.1936	10.9202	0.00284871	0.997575
42	0.0320123	0.550817	15.0544	10.2283	0.00204026	0.984274
43	0.031848	0.580164	15.5758	10.3998	0.00199866	0.996024
44	0.0581439	0.803265	25.7261	13.5484	0.0147859	0.93222
45	0.0372462	0.616488	18.2934	12.5661	0.00293363	0.995269
46	0.0567527	0.849596	30	14.2587	0.0212103	0.963453
47	0.0396375	0.611316	17.3745	11.4033	0.00287006	0.993419
48	0.0528165	0.705978	22.0063	12.6719	0.0060736	0.991765
49	0.0316732	0.564702	16.8787	12.2267	0.00220254	0.996196
50	0.0442023	0.579037	15.5481	10.3199	0.00347787	0.989938
51	0.0330982	0.598845	16.6997	11.4007	0.00233825	0.995016
52	0.0160716	0.526253	13.6044	6.89414	0.000801527	0.950816
53	0.00623093	0.499884	14.2008	3.51992	0.000335261	0.891448
54	0.018404	0.511208	12.5966	6.79337	0.00100333	0.961203
55	0.0570276	0.682175	20.1621	11.9119	0.00636672	0.990398
56	0.0200472	0.503293	13.5544	9.04212	0.00126032	0.980843
57	0.0564092	0.629916	18.808	11.6051	0.00738184	0.98675
58	0.0133914	0.461946	10.1246	4.27394	0.000763298	0.913771
59	0.0254319	0.610748	17.3114	10.7566	0.00136803	0.982106
60	0.0123176	0.476315	12.1785	5.10287	0.000635131	0.914798
61	0.0355277	0.597985	17.0956	11.8934	0.00280805	0.997746
62	0.00906246	0.491771	14.1329	5.3834	0.000466852	0.927819
63	0.0373527	0.547379	15.69	11.3494	0.00295412	0.998641
64	0.02682	0.555417	16.405	12.4407	0.00200326	0.996503
65	0.0284842	0.552233	14.4645	8.79262	0.00143033	0.966536
66	0.0512129	0.626569	17.2836	11.185	0.00649966	0.984967
67	0.0179908	0.471172	12.8801	7.03604	0.000867248	0.96123
68	0.0220532	0.509308	13.3385	8.42801	0.00125464	0.973858
69	0.0239794	0.576113	14.0846	8.07437	0.0012943	0.974203
70	0.031917	0.600947	18.5165	14.1686	0.00300525	0.99351
71	0.0428751	0.608723	15.8537	9.69464	0.00260298	0.980146
72	0.0283584	0.580719	13.9403	7.6841	0.00150133	0.976808
73	0.0291591	0.564615	14.2834	9.22645	0.00180515	0.991544
74	0.0149372	0.424312	10.3521	6.43972	0.0007443	0.940515
75	0.0452251	0.638701	19.8143	13.1701	0.00515804	0.991208
76	0.0253209	0.581342	15.5219	10.5244	0.00172518	0.992096
77	0.0626144	0.736838	23.8959	12.2864	0.0101942	0.987822
78	0.0550376	0.706815	22.2075	12.7747	0.00740248	0.958429
79	0.007667	0.361931	8.34979	3.24509	0.000391315	0.879198
80	0.0627869	0.656539	17.2666	9.8942	0.00767156	0.991404
81	0.0241021	0.512724	13.3388	9.14223	0.00152985	0.992177
82	0.0265392	0.499611	11.4739	6.90388	0.00150942	0.968485
83	0.0376961	0.578203	15.444	11.0998	0.00337944	0.993082
84	0.031821	0.530115	14.0278	9.57335	0.00199056	0.988777
85	0.066062	0.658947	20.4738	11.3058	0.0115039	0.985229
86	0.0559655	0.721942	23.6191	13.3821	0.0106317	0.918169
87	0.0329311	0.574801	15.7249	10.5788	0.00208171	0.993245
88	0.0084814	0.449829	11.2169	3.79205	0.000496199	0.896439
89	0.0415987	0.647502	16.3935	10.0359	0.00299437	0.994177
90	0.0246881	0.365399	7.93674	7.16114	0.00127863	0.964354
91	0.0159891	0.513972	13.5298	7.06614	0.000828413	0.947055
92	0.0235209	0.568295	15.7022	10.2527	0.00133237	0.986455
93	0.0313438	0.589812	18.8079	14.6609	0.00286528	0.992417
94	0.0471342	0.678666	18.5316	11.3782	0.00421908	0.99501
95	0.0479526	0.669076	17.8506	11.2325	0.00507137	0.991455
96	0.0406775	0.623537	15.4904	9.92143	0.00314859	0.997846
97	0.0196958	0.518462	14.0113	8.55778	0.00110557	0.958887
98	0.027051	0.544087	16.1009	11.6517	0.00172063	0.990609
99	0.0316765	0.548242	15.244	11.3727	0.00214002	0.993696
100	0.0374735	0.569337	16.8944	11.8132	0.00292606	0.991458
101	0.0545053	0.671918	19.1375	11.3789	0.00646099	0.993561
102	0.0495931	0.588121	15.5768	10.2756	0.00447458	0.99486
103	0.038163	0.560456	15.7125	11.5627	0.00343779	0.995644
104	0.0219582	0.564454	16.7425	11.8633	0.00135298	0.990633
105	0.0053075	0.439321	11.3821	2.7083	0.000319843	0.874196
106	0.0204312	0.531259	13.9688	8.45433	0.00110582	0.97536
107	0.0205614	0.547345	13.8028	8.53391	0.00124575	0.985714
108	0.0259814	0.557194	17.13	13.0557	0.00187955	0.994733
109	0.0305444	0.557471	13.8749	8.50862	0.00170648	0.985664
110	0.0215285	0.546851	14.0492	8.80805	0.00124498	0.988805
111	0.0244069	0.486026	12.1268	7.69589	0.00140316	0.966387
112	0.014094	0.493318	12.6723	6.20264	0.000763895	0.946114
113	0.0287464	0.554889	15.3797	11.2769	0.00211998	0.998602
114	0.0368366	0.609746	14.7047	8.91431	0.00232543	0.989777
115	0.0421136	0.601545	16.4543	11.3303	0.00429012	0.996521
116	0.0412476	0.622617	17.4324	11.7247	0.00355844	0.994614
117	0.00496473	0.418316	10.1228	1.23674	0.000288882	0.803011
118	0.0476054	0.67753	22.0291	13.6629	0.00588562	0.992225
119	0.0185246	0.545454	15.0926	9.40587	0.00104948	0.977774
120	0.0433397	0.555983	14.555	9.97009	0.00368608	0.997253
121	0.00930629	0.443787	10.1499	3.20854	0.000458606	0.843156
122	0.0242832	0.532189	14.17	9.53962	0.00148695	0.990798
123	0.0278705	0.557682	15.3258	10.7476	0.00187652	0.993833
124	0.0430297	0.616928	16.0925	10.6163	0.00388436	0.996412
125	0.0234355	0.556251	14.2958	9.00523	0.00141023	0.982163
126	0.0347554	0.607506	17.0316	11.5944	0.00256733	0.994908
127	0.054582	0.718684	22.046	12.9008	0.00875152	0.981291
128	0.0153549	0.507037	12.15	5.8197	0.000826336	0.949374
129	0.0319443	0.554089	14.3629	9.76437	0.00217472	0.992442
130	0.0478092	0.648296	18.2995	11.6397	0.00496818	0.995613
131	0.0341021	0.643776	18.998	13.4164	0.00303478	0.997742
132	0.013656	0.364203	7.80138	4.74637	0.000752676	0.931041
133	0.0489432	0.631921	15.4616	9.37246	0.00384674	0.998097
134	0.0447794	0.63603	18.5301	12.1335	0.00401932	0.99305
135	0.0336945	0.594071	16.4526	11.3962	0.00250965	0.997439
136	0.0163689	0.449445	10.0948	4.82334	0.000826839	0.91216
137	0.0267962	0.567016	15.8908	10.3321	0.00151312	0.982618
138	0.0303431	0.581079	16.99	12.1859	0.00219594	0.99647
139	0.0586885	0.680113	20.6369	12.0158	0.0114118	0.909006
140	0.0645855	0.697615	20.8494	11.3013	0.00982613	0.977154
141	0.0248725	0.573067	15.3241	9.72593	0.00145136	0.97997
142	0.0167799	0.407085	8.20648	4.8366	0.000953833	0.93969
143	0.0161837	0.538509	15.4171	8.94061	0.000836703	0.963778
144	0.0271595	0.531724	12.5114	7.74791	0.0016472	0.98404
145	0.0400368	0.578665	15.494	10.721	0.0034332	0.995993
146	0.00686011	0.491483	13.4285	3.93819	0.000407346	0.91156
147	0.0508896	0.618619	19.6096	12.6546	0.00728769	0.987172
148	0.0439044	0.624426	16.5557	10.9849	0.00413084	0.995792
149	0.0195867	0.529134	15.5704	9.76659	0.000963726	0.96521
150	0.0144601	0.527246	12.9771	6.49445	0.000839707	0.962827
151	0.0310049	0.557656	15.3022	10.2537	0.00186489	0.987533
152	0.0241199	0.499273	12.4452	7.38158	0.00126858	0.962694
153	0.0500812	0.672761	19.7464	12.1148	0.00581178	0.990854
154	0.038486	0.561279	15.2605	10.4687	0.00284696	0.993694
155	0.0200066	0.551619	16.8035	11.1253	0.00104034	0.971909
156	0.0297159	0.575296	15.4133	9.20809	0.00144828	0.976691
157	0.0155151	0.547475	14.8393	8.23936	0.000858548	0.963325
158	0.041761	0.593247	15.824	10.6149	0.00340057	0.997565
159	0.0363239	0.621263	18.4541	12.7923	0.00280922	0.995259
160	0.0264836	0.518189	13.3892	8.53572	0.00149534	0.984927
161	0.0117438	0.368777	8.91509	5.71397	0.000654304	0.943219
162	0.0277863	0.549994	12.1047	7.26422	0.00175956	0.989308
163	0.0380561	0.584384	15.4409	10.7828	0.00325906	0.997174
164	0.0303026	0.602561	17.5265	12.0488	0.00197003	0.988592
165	0.0265582	0.576849	15.7075	10.9678	0.0018445	0.992383
166	0.0443551	0.588386	15.4461	10.0441	0.00341129	0.996059
167	0.03887	0.576965	15.7787	10.9446	0.00340275	0.995735
168	0.0460063	0.639729	18.7724	12.0074	0.00415947	0.994829
169	0.048026	0.57345	14.4821	9.45726	0.00405467	0.995205
170	0.0463572	0.634578	19.7351	13.1558	0.00648323	0.983346
171	0.0241599	0.59489	15.1538	8.847	0.0012635	0.976531
172	0.0477855	0.654149	17.7011	11.1201	0.00476389	0.997097
173	0.0335694	0.605882	16.2339	11.0777	0.0024857	0.998737
174	0.0361501	0.617399	17.4471	12.5604	0.00366122	0.990356
175	0.0304753	0.552684	16.4821	12.6917	0.0025871	0.995613
176	0.0104465	0.506691	12.5812	4.52994	0.000577288	0.921568
177	0.0248089	0.586798	15.4568	9.24895	0.00137032	0.967383
178	0.0285646	0.597364	14.7517	8.77657	0.00168101	0.98615
179	0.0281849	0.497494	13.4624	9.6297	0.00186107	0.983786
180	0.0316702	0.595509	17.239	11.5941	0.00187441	0.993156
181	0.0506339	0.709979	22.2905	13.0883	0.00675223	0.991403
182	0.0117496	0.530681	13.3409	4.78173	0.000589723	0.913435
183	0.0249984	0.564396	16.0698	11.5149	0.00165378	0.997499
184	0.0247974	0.582831	13.9708	7.68659	0.00134246	0.964289
185	0.0106449	0.421568	10.9375	4.66608	0.000569041	0.90711
186	0.0289797	0.541841	13.4611	9.26704	0.00211098	0.993389
187	0.0285762	0.578624	17.6427	13.3017	0.00217029	0.99696
188	0.0212247	0.563558	16.3379	11.0634	0.00126314	0.981086
189	0.0542332	0.670849	19.8366	11.4325	0.00525032	0.977539
190	0.0330689	0.540644	13.5592	8.28739	0.00173291	0.976452
191	0.0247309	0.565743	15.8496	9.90347	0.0012659	0.970755
192	0.0331099	0.608242	15.2235	9.64254	0.00218589	0.992912
193	0.0237064	0.539625	15.7787	10.9027	0.00137168	0.980259
194	0.00999861	0.405704	9.50833	4.49393	0.000531552	0.928064
195	0.0241476	0.557397	14.9674	9.34072	0.00127875	0.983007
196	0.0202632	0.556712	13.2171	6.63969	0.00108144	0.947865
197	0.0261975	0.546467	14.571	10.4726	0.00165474	0.986916
198	0.0377235	0.603005	14.6559	9.4286	0.00279368	0.997325
199	0.0257654	0.547163	13.7938	8.67293	0.00146904	0.986586
200	0.0438426	0.616226	19.0726	12.489	0.00382311	0.986095
201	0.0207251	0.509469	12.1069	6.91502	0.00121586	0.968744
202	0.0106504	0.414564	10.4172	5.19104	0.00056894	0.931461
203	0.0387002	0.618388	18.1456	12.5938	0.00343608	0.997049
204	0.0301237	0.537038	15.3642	10.8937	0.00189793	0.991595
205	0.0556752	0.719735	23.2703	13.5979	0.0105056	0.961041
206	0.0201498	0.506185	12.8675	7.50048	0.00110959	0.964934
207	0.0230503	0.537235	14.0413	8.16898	0.00113308	0.961237
208	0.0479866	0.725323	21.975	13.6381	0.0065992	0.956944
209	0.0272391	0.619228	16.841	11.4855	0.00187359	0.998248
210	0.0318066	0.573901	13.3932	8.00439	0.00186905	0.983344
211	0.0559842	0.706198	22.613	13.2281	0.00982475	0.956981
212	0.0261115	0.578112	14.0514	8.52826	0.00152802	0.991443
213	0.0317184	0.603278	15.5517	10.0029	0.00200885	0.993535
214	0.021521	0.526692	14.1586	8.28767	0.00102733	0.962796
215	0.0367596	0.544591	13.0512	8.39377	0.00230821	0.991075
216	0.0381328	0.595662	16.1453	10.8208	0.00280952	0.997745
217	0.0194448	0.506449	14.3254	9.57033	0.00112576	0.979169
218	0.0578149	0.640679	19.7918	12.0145	0.00865946	0.980218
219	0.0165333	0.522603	11.3683	4.97763	0.000924233	0.937705
220	0.0193312	0.541365	14.3391	9.03878	0.00113855	0.987824
221	0.0347693	0.60795	15.5076	10.3152	0.00254609	0.99847
222	0.0440947	0.640496	18.8763	12.1406	0.00408097	0.995934
223	0.0316174	0.51777	14.6818	11.039	0.00235758	0.994823
224	0.0271661	0.532158	13.3377	8.56638	0.00165066	0.980042
225	0.069833	0.692992	20.1295	10.5765	0.0117572	0.984234
226	0.0343419	0.613232	15.3871	9.77439	0.0023008	0.99525
227	0.0334701	0.561665	13.7603	9.33923	0.0024552	0.997951
228	0.0318466	0.594567	15.6428	10.2222	0.00206112	0.993326
229	0.00575993	0.407712	9.11831	0.71788	0.000310266	0.758837
230	0.0334275	0.551084	14.2679	9.12985	0.001884	0.986726
231	0.0275865	0.559649	15.3662	10.7127	0.0018119	0.995526
232	0.0373196	0.570494	14.6141	9.83537	0.00262379	0.998542
233	0.00700631	0.38407	8.96372	3.25914	0.000415733	0.880073
234	0.0558843	0.721427	23.465	13.0598	0.00913842	0.988405
235	0.0272357	0.531604	15.8994	11.3961	0.0016533	0.983174
236	0.0418759	0.625047	18.1833	12.54	0.00435219	0.989681
237	0.00866669	0.459625	12.5362	4.76288	0.000499693	0.922533
238	0.0561905	0.69889	20.1786	11.7699	0.00794593	0.96005
239	0.0435062	0.623634	16.5289	10.5882	0.00335086	0.997805
240	0.0131355	0.499445	13.364	7.15053	0.000777519	0.957321
241	0.017286	0.551428	14.984	8.94442	0.00098748	0.980775
242	0.0441469	0.63053	18.4054	12.3236	0.00433847	0.992286
243	0.0399584	0.620878	19.153	13.5466	0.00422101	0.990138
244	0.0163846	0.533368	14.8349	8.79764	0.000938125	0.969049
245	0.0327375	0.617668	18.934	13.5386	0.00251709	0.997551
246	0.0443376	0.598151	16.766	11.1391	0.00348046	0.99599
247	0.0356457	0.602882	16.1526	10.5008	0.00235814	0.991894
248	0.0158025	0.486447	11.4322	5.36034	0.000830847	0.931796
249	0.0441158	0.658664	18.5294	11.8019	0.00409926	0.996523
250	0.0209101	0.571376	15.4291	9.8623	0.00123324	0.982721
251	0.0453141	0.605023	16.9201	11.6594	0.00515439	0.98417
252	0.0580998	0.715527	23.6396	13.4242	0.0162478	0.927458
253	0.0566398	0.672951	20.9286	12.153	0.0098599	0.990012
254	0.0211298	0.535648	12.5893	6.99081	0.00119528	0.96585
255	0.0368542	0.592097	15.3123	10.018	0.00257421	0.995525
256	0.0302944	0.624964	17.5138	11.9647	0.00216252	0.994028
257	0.0355558	0.635354	17.3573	11.779	0.00277524	0.994351
258	0.0616671	0.703245	21.5499	11.6526	0.0101247	0.991158
259	0.057687	0.672638	19.741	11.6863	0.00784733	0.966086
260	0.0502336	0.65227	17.7549	10.9454	0.00442326	0.995365
261	0.0508499	0.654228	19.4098	11.6034	0.00459902	0.991537
262	0.0394487	0.601131	17.3285	12.0391	0.00343116	0.996949
263	0.0432264	0.620483	19.9848	13.5727	0.0050029	0.993022
264	0.0215006	0.523739	13.1172	8.02285	0.00123364	0.98133
265	0.00876568	0.412399	10.1531	4.49151	0.000471467	0.92827
266	0.0265536	0.549945	16.1686	11.9748	0.00179237	0.994688
267	0.0194045	0.520486	12.9787	7.64758	0.00114435	0.977015
268	0.0357555	0.555745	14.8675	10.2904	0.00256815	0.995964
269	0.0254353	0.559174	14.7962	9.56371	0.0014922	0.986128
270	0.0417113	0.58245	17.5265	13.026	0.00549023	0.977371
271	0.0321241	0.594069	14.8476	9.77507	0.00225487	0.997595
272	0.0578643	0.737324	23.0777	13.1758	0.0172129	0.928359
273	0.0128715	0.380491	8.69252	5.95202	0.000750302	0.959712
274	0.0138801	0.5476	13.8673	6.17868	0.000723188	0.941872
275	0.0258613	0.533662	15.2803	11.1737	0.00170409	0.99687
276	0.0212652	0.505374	12.057	6.59853	0.00114237	0.945652
277	0.0568895	0.871601	30	14.8351	0.0320029	0.682014
278	0.0443257	0.546736	13.0242	8.39236	0.00302613	0.993588
279	0.0461459	0.656091	19.0805	11.9123	0.00429213	0.997822
280	0.0411354	0.6066	16.9697	11.3149	0.00305003	0.990289
281	0.0623698	0.707668	21.5585	11.8783	0.012846	0.966531
282	0.0354199	0.546359	14.3807	10.1873	0.00257703	0.998799
283	0.010709	0.418982	9.4187	4.00861	0.000565413	0.908951
284	0.032066	0.612915	16.4965	10.8545	0.00209568	0.994717
285	0.0121113	0.50252	11.7502	4.4026	0.000647053	0.91803
286	0.0333515	0.565943	14.3662	9.03551	0.00195305	0.9814
287	0.0312122	0.547786	15.0252	10.1543	0.00193407	0.983266
288	0.0288998	0.560665	16.4083	12.3582	0.00227758	0.997831
289	0.0175463	0.418733	10.1693	7.06435	0.000946005	0.980498
290	0.0260008	0.487395	11.5376	7.63688	0.00168505	0.985788
291	0.0612169	0.619498	17.7089	10.7693	0.00980103	0.982305
292	0.00695476	0.470891	10.6703	2.52261	0.000416109	0.84376
293	0.0401808	0.585262	14.8018	9.24236	0.00242469	0.98883
294	0.03934	0.614968	18.1729	12.523	0.00347911	0.994409
295	0.0191703	0.538508	14.4485	9.02167	0.00108227	0.983294
296	0.0045691	0.424288	10.8818	0.861013	0.000252783	0.797583
297	0.0343358	0.549342	14.0767	8.87689	0.00188289	0.981479
298	0.0245947	0.533311	12.836	7.46097	0.00136563	0.96992
299	0.0440986	0.611956	19.0814	13.0405	0.00464391	0.986098
300	0.0496754	0.68831	19.9166	12.2211	0.00566727	0.982207
301	0.0177981	0.507325	14.0488	8.97234	0.0010627	0.971562
302	0.0433989	0.651539	19.3211	12.4299	0.00410099	0.996154
303	0.0383363	0.626516	18.3517	12.0454	0.00269496	0.995766
304	0.0426417	0.624786	17.3624	11.4952	0.00385905	0.996354
305	0.00642593	0.473198	12.8735	3.50849	0.000384846	0.891531
306	0.0227453	0.551244	15.1925	10.0889	0.0013316	0.988514
307	0.054661	0.772338	27.1809	14.7971	0.0159141	0.921799
308	0.0223568	0.512741	13.4857	8.29682	0.00120896	0.970001
309	0.0361722	0.58627	16.6695	11.7569	0.00294556	0.994867
310	0.0552774	0.622884	18.9582	11.9932	0.00868327	0.960732
311	0.0191565	0.484733	14.3177	10.7535	0.0012545	0.992017
312	0.0288447	0.553764	15.8977	11.3908	0.00190906	0.994314
313	0.0373043	0.607066	19.0028	13.6864	0.00344175	0.995325
314	0.0365104	0.5674	16.0051	11.2411	0.0027431	0.99651
315	0.0562926	0.657363	20.142	12.1162	0.00890166	0.969711
316	0.0206758	0.4315	9.07606	5.50227	0.00100585	0.93781
317	0.0204601	0.572181	17.5816	12.426	0.00120334	0.985337
318	0.03264	0.578446	14.6701	9.59269	0.00212016	0.994941
319	0.043587	0.588888	16.1079	10.6666	0.00322139	0.994667
320	0.0211368	0.517859	13.7392	8.42909	0.00111464	0.97259
321	0.0441163	0.602821	16.4026	10.2696	0.00276433	0.987185
322	0.0289038	0.577025	18.0636	13.6929	0.00222475	0.996184
323	0.0423822	0.645211	20.8211	14.1677	0.00501902	0.989011
324	0.0556738	0.691641	21.9399	12.39	0.00655464	0.994436
325	0.0243143	0.591553	18.4606	13.3788	0.00157252	0.985097
326	0.024521	0.507661	12.996	8.34695	0.00146007	0.974432
327	0.0430655	0.621092	17.1268	11.1119	0.00372737	0.993262
328	0.0395023	0.564864	14.6914	10.0158	0.00295916	0.997741
329	0.0184904	0.53687	15.5829	9.56534	0.00093206	0.971711
330	0.0247754	0.531251	12.875	7.9265	0.00145788	0.981665
331	0.0342594	0.566462	13.3707	8.19774	0.00206595	0.986248
332	0.0488991	0.670683	18.8473	12.2469	0.0069386	0.955478
333	0.0522742	0.615576	18.1718	11.597	0.00617105	0.995283
334	0.0224061	0.503242	13.3113	8.43291	0.0012317	0.970391
335	0.0349375	0.571091	16.1154	11.1107	0.00261262	0.984181
336	0.0294428	0.584526	16.761	12.3066	0.00221024	0.998414
337	0.0646927	0.666087	18.2868	10.2571	0.0078979	0.980374
338	0.0235069	0.508494	11.4531	6.24204	0.00129924	0.950091
339	0.0452818	0.618853	17.9614	11.8474	0.00404694	0.994138
340	0.0173601	0.432908	11.4988	6.94338	0.000910973	0.948295
341	0.0293532	0.583403	15.3956	10.2226	0.00189733	0.989312
342	0.0511895	0.671769	19.4797	11.7322	0.00502561	0.996718
343	0.0261182	0.541041	16.0337	11.7258	0.00164274	0.996722
344	0.0140024	0.489518	13.1429	6.38507	0.000685723	0.935707
345	0.0350701	0.54913	15.3178	10.2426	0.00206428	0.98364
346	0.0219909	0.468494	12.3813	8.01846	0.0011379	0.959902
347	0.0334219	0.59154	18.048	12.7389	0.00238839	0.995148
348	0.0180467	0.552399	15.2403	8.76289	0.000938244	0.964919
349	0.0309338	0.605505	16.2612	10.8099	0.00207736	0.993319
350	0.0214738	0.571978	14.3836	8.85826	0.00135097	0.987829
351	0.0174727	0.535739	14.8633	8.43838	0.000885696	0.961036
352	0.0325808	0.541099	12.987	8.28207	0.00209879	0.979452
353	0.0288379	0.589366	19.3135	14.5529	0.00213809	0.988481
354	0.0345157	0.563749	14.5428	9.86669	0.00237348	0.996028
355	0.0503347	0.641932	19.2098	12.5774	0.00766282	0.95823
356	0.0146547	0.54583	11.9397	4.88417	0.000834804	0.94486
357	0.037722	0.654126	17.6135	11.8642	0.00334017	0.990698
358	0.065411	0.674721	19.8651	11.221	0.00962134	0.984094
359	0.040949	0.647213	20.63	13.869	0.00404982	0.997111
360	0.0330484	0.609327	15.3545	9.52947	0.00204292	0.988072
361	0.014886	0.52277	13.4336	7.11692	0.000869765	0.963379
362	0.0339607	0.601619	15.9397	10.3039	0.00212883	0.993902
363	0.0261581	0.556611	15.1807	10.9211	0.001798	0.998796
364	0.0128443	0.498753	14.4458	7.92481	0.000678958	0.961513
365	0.0299435	0.560065	13.8564	8.76237	0.00187867	0.981884
366	0.0228498	0.565968	14.8977	9.74662	0.00144902	0.989662
367	0.0302517	0.572821	14.7428	9.50542	0.00189678	0.98455
368	0.0128208	0.401372	7.5508	3.54327	0.000669695	0.877543
369	0.0187685	0.492169	12.784	6.32611	0.000845847	0.949415
370	0.0314926	0.559399	14.0295	8.82941	0.00179066	0.987927
371	0.0588284	0.706191	23.0016	12.6573	0.0106009	0.958274
372	0.0153077	0.515293	12.3775	5.95591	0.000856945	0.946419
373	0.0474109	0.639653	18.421	11.9709	0.00443144	0.994294
374	0.0150465	0.491061	11.9459	5.87712	0.000847172	0.946497
375	0.0223252	0.531221	15.2358	10.4984	0.00134774	0.983595
376	0.0463382	0.681449	21.3426	13.1829	0.00458491	0.995328
377	0.0467464	0.623571	16.1889	10.4214	0.00452857	0.997015
378	0.0193031	0.507199	13.2544	7.59551	0.0010019	0.951836
379	0.0261924	0.523612	14.69	10.5661	0.00169741	0.992872
380	0.013573	0.536986	14.3984	7.20747	0.000739922	0.956988
381	0.00503508	0.433944	11.0149	1.37258	0.000290272	0.802565
382	0.0265467	0.571175	16.228	10.521	0.00140525	0.989417
383	0.0428669	0.623577	17.0939	11.4555	0.00430497	0.995906
384	0.0236243	0.551144	15.6931	11.4752	0.00162509	0.996636
385	0.042845	0.605594	17.3119	11.9139	0.00394027	0.992778
386	0.0254195	0.536968	13.384	8.0134	0.00137952	0.968688
387	0.0416021	0.661658	17.8228	11.6628	0.00399865	0.991993
388	0.0265178	0.575129	15.8236	11.0736	0.00181381	0.992791
389	0.0141618	0.525041	12.8639	5.13772	0.000686452	0.943009
390	0.0193683	0.548347	12.9399	6.52933	0.00102644	0.954535
391	0.0191355	0.507133	12.8619	7.53313	0.00106325	0.965959
392	0.0270589	0.529004	13.6448	11.121	0.00175052	0.996685
393	0.00739766	0.416868	9.05301	2.99124	0.000479041	0.870241
394	0.0263609	0.563143	15.7119	10.2138	0.00145221	0.980833
395	0.0395527	0.623007	16.9216	11.9462	0.00407692	0.959273
396	0.0398384	0.548837	14.3233	9.57499	0.0026276	0.995682
397	0.0316792	0.59336	15.495	10.0844	0.00201406	0.994091
398	0.0623787	0.729824	22.538	12.0535	0.0108733	0.973479
399	0.0420701	0.579791	16.3561	11.2712	0.00357656	0.99671
400	0.0167137	0.563716	13.4675	6.95653	0.00101155	0.96949
401	0.0339976	0.599055	16.8161	11.7239	0.00235008	0.996899
402	0.0301063	0.531059	13.8128	9.06947	0.00179742	0.980415
403	0.0430215	0.673242	20.2278	13.5781	0.00484953	0.976554
404	0.0351461	0.556042	16.0544	11.6977	0.00277318	0.996315
405	0.0151152	0.509558	13.4048	6.81939	0.000768401	0.948492
406	0.0297158	0.558414	16.7036	12.185	0.00202754	0.993599
407	0.0693941	0.64599	18.5054	10.4252	0.0130349	0.965278
408	0.0480914	0.66887	19.7188	12.6202	0.00658423	0.990601
409	0.0327301	0.602926	15.4708	9.79899	0.00212267	0.985349
410	0.0283111	0.53628	13.259	8.26056	0.00161271	0.977826
411	0.0236544	0.527727	12.6462	7.0218	0.00128021	0.980978
412	0.0321595	0.587033	17.0108	12.3349	0.00248042	0.997235
413	0.0255273	0.543965	15.951	11.5155	0.00157208	0.996848
414	0.0630442	0.775905	28.9993	14.2891	0.0356441	0.89048
415	0.04144	0.622224	18.5046	12.9604	0.00477507	0.988243
416	0.030767	0.561194	13.0186	7.90768	0.00186189	0.986026
417	0.0346884	0.592828	15.699	10.5305	0.00242294	0.994042
418	0.0283064	0.546157	13.1102	8.07708	0.00167181	0.985449
419	0.0172937	0.520422	14.2429	8.29078	0.000928819	0.964018
420	0.0533452	0.692786	20.9927	12.897	0.00993125	0.918008
421	0.0284477	0.500497	12.9619	8.81703	0.00165943	0.988318
422	0.0522125	0.583073	16.4785	11.1825	0.00571356	0.993391
423	0.00877861	0.420186	9.58061	3.68098	0.000504527	0.892014
424	0.0261905	0.536	15.7024	11.8812	0.00184622	0.997013
425	0.0251165	0.559766	17.0272	12.5183	0.00165418	0.990724
426	0.0455378	0.670002	18.8242	11.8402	0.00465782	0.996364
427	0.0276198	0.58141	16.3471	11.0924	0.00172254	0.989445
428	0.0167065	0.524564	14.9518	9.57378	0.000986834	0.978686
429	0.0384105	0.653236	18.6305	12.4682	0.00355921	0.996377
430	0.0256673	0.553503	15.0287	10.3934	0.00161379	0.997251
431	0.0230058	0.544219	14.163	8.82446	0.001319	0.976883
432	0.00716232	0.438877	11.5004	3.57035	0.000382937	0.884197
433	0.0443133	0.639609	17.9893	11.8847	0.00458119	0.994739
434	0.0248939	0.537078	14.4519	9.43089	0.00150289	0.986642
435	0.05077	0.741923	23.1078	13.2967	0.00600354	0.99119
436	0.0211218	0.547825	13.7477	7.52967	0.00108877	0.958442
437	0.0352606	0.612768	18.7681	12.8081	0.0024142	0.991538
438	0.0118408	0.408901	9.44324	5.04144	0.000633825	0.933579
439	0.0236065	0.568703	13.4102	7.84885	0.00142108	0.984198
440	0.06116	0.67111	18.8724	10.9505	0.00821461	0.980944
441	0.0333049	0.606352	17.5432	11.8173	0.0022227	0.990316
442	0.0348224	0.589547	15.0998	9.77807	0.00229767	0.992046
443	0.0231229	0.542073	13.3553	8.12053	0.00142474	0.978588
444	0.0390632	0.591659	17.8164	12.5152	0.00291701	0.994877
445	0.00685593	0.389502	8.75661	2.9864	0.000440919	0.858854
446	0.0417039	0.634118	16.4541	10.453	0.00341043	0.996012
447	0.00681962	0.410414	10.6639	3.03298	0.000347704	0.847997
448	0.0573984	0.635252	15.9504	9.51104	0.00610669	0.99674
449	0.0428061	0.575204	15.4107	10.4458	0.00330613	0.997869
450	0.0226257	0.515052	13.4945	8.904	0.00140248	0.984071
451	0.0417319	0.595679	15.8553	10.2665	0.002913	0.995653
452	0.0387166	0.599693	16.3031	10.9564	0.0029777	0.996951
453	0.0335083	0.65574	16.9239	9.98074	0.00184465	0.987769
454	0.0367641	0.575813	16.251	11.2697	0.00278891	0.995368
455	0.0405273	0.562536	15.507	10.5944	0.00310225	0.992498
456	0.0407725	0.731191	23.9338	15.1568	0.00488942	0.993704
457	0.0523323	0.638285	16.771	10.2873	0.00497346	0.991145
458	0.0401699	0.641327	18.3438	11.8025	0.00297976	0.993853
459	0.0476162	0.636793	16.7434	10.1879	0.00354756	0.996488
460	0.0311872	0.561077	16.3162	12.019	0.00230349	0.997961
461	0.0260912	0.497735	11.7129	7.31007	0.00151609	0.97255
462	0.0336352	0.535478	13.2927	9.11712	0.00236445	0.996119
463	0.0553851	0.734221	23.6847	13.5434	0.0131494	0.885814
464	0.0490638	0.710882	22.6482	13.864	0.00604262	0.980139
465	0.0185338	0.473158	12.233	7.16831	0.00099476	0.958026
466	0.0335415	0.664977	22.9467	16.1623	0.00299718	0.990425
467	0.0418476	0.553984	16.2242	11.6989	0.00402786	0.9946
468	0.0324579	0.592739	17.408	12.1201	0.00225454	0.991066
469	0.0116156	0.41863	8.30249	3.67651	0.000711516	0.898885
470	0.0191688	0.520796	13.7128	8.30292	0.00108706	0.974085
471	0.0579276	0.69001	21.4957	12.3764	0.00813063	0.974862
472	0.0105627	0.469264	12.2508	5.09235	0.000571853	0.93074
473	0.0369942	0.62659	18.8218	12.9951	0.00317969	0.996688
474	0.0378544	0.5864	16.1288	11.3389	0.0031328	0.99408
475	0.0203835	0.512709	13.509	8.33338	0.001122	0.978633
476	0.0368815	0.646903	18.2415	11.7823	0.0026618	0.993474
477	0.00434491	0.446284	11.9501	1.10131	0.000264764	0.804127
478	0.0401642	0.58941	14.3186	9.40728	0.00311988	0.997688
479	0.0238678	0.539586	15.818	10.5856	0.00127979	0.988924
480	0.0253442	0.519527	13.5668	9.18043	0.00165126	0.981391
481	0.040898	0.568154	14.9686	10.1367	0.00308701	0.997077
482	0.0294033	0.524269	14.2309	9.68904	0.0017479	0.983754
483	0.0448791	0.720967	22.7705	14.4298	0.00519363	0.964692
484	0.0526301	0.667873	21.3643	13.1916	0.00699683	0.979753
485	0.0121149	0.505057	14.3961	7.73874	0.000678545	0.9617
486	0.0304381	0.572708	14.5792	9.66381	0.00201866	0.993931
487	0.0240768	0.547269	13.0375	7.90785	0.00148734	0.983284
488	0.0119681	0.375498	7.29562	3.61813	0.000653565	0.862236
489	0.0173542	0.527964	16.4251	9.90857	0.00082098	0.975231
490	0.0161278	0.486102	14.0119	8.71697	0.000875588	0.959771
491	0.0212853	0.542715	16.2844	11.6162	0.00128818	0.983405
492	0.0335371	0.557957	14.4901	9.19141	0.00190007	0.984364
493	0.0300719	0.548193	15.4724	11.107	0.00202053	0.997714
494	0.0536611	0.641332	21.427	13.3096	0.00871411	0.971377
495	0.041652	0.627069	18.7567	12.3495	0.00337075	0.996167
496	0.0253739	0.50404	12.0354	7.49782	0.00143905	0.980936
497	0.0353255	0.586178	16.1048	10.8253	0.00244102	0.993248
498	0.0572375	0.67053	20.4326	12.2385	0.0104831	0.973487
499	0.0161523	0.550276	12.6011	5.62883	0.000883083	0.944791
500	0.029663	0.478398	12.5449	10.9256	0.00200293	0.992813
501	0.0116173	0.495957	12.6791	5.96337	0.000716494	0.953983
502	0.0220134	0.540724	13.8376	8.52819	0.00130761	0.973702
503	0.0325615	0.584338	16.1045	10.7532	0.00209453	0.990486
504	0.0412929	0.600307	16.1951	11.0438	0.0033561	0.996015
505	0.0642036	0.691912	20.4209	11.405	0.0096831	0.985233
506	0.0379526	0.632146	17.7884	12.1091	0.00312139	0.994788
507	0.0576744	0.643023	20.3173	12.4268	0.0117107	0.98154
508	0.0158619	0.512545	13.9112	7.7813	0.000830405	0.95878
509	0.0407695	0.574009	15.5025	10.9036	0.00347592	0.995888
510	0.0127867	0.546629	12.1369	4.18779	0.000663473	0.919983
511	0.0186568	0.368714	8.16177	7.61739	0.00110894	0.983648
512	0.0175187	0.496203	11.8339	5.76612	0.000893071	0.935018
513	0.00635008	0.384532	7.72972	1.27145	0.000366604	0.755741
514	0.0278888	0.546558	15.3802	10.4325	0.00159026	0.987807
515	0.0346585	0.573327	14.6771	9.80993	0.00238089	0.997483
516	0.064818	0.689155	22.3611	11.8946	0.0125898	0.98545
517	0.032968	0.585986	15.7675	10.5837	0.00220872	0.99286
518	0.0866534	0.662618	20.7182	9.77269	0.0281219	0.979394
519	0.0343861	0.634353	17.0407	11.71	0.00285563	0.995601
520	0.00695751	0.513175	13.0584	2.84487	0.000351217	0.863928
521	0.0209209	0.558477	14.8568	9.37123	0.0012114	0.987157
522	0.0331868	0.589384	16.9679	11.7188	0.00228699	0.993237
523	0.0342741	0.540414	14.0206	9.11262	0.00199597	0.983675
524	0.0377106	0.585882	14.5555	9.42793	0.00253021	0.99028
525	0.0370223	0.582371	14.8308	10.042	0.00268758	0.997177
526	0.0568617	0.682087	21.2283	12.8737	0.0106456	0.887833
527	0.0243566	0.564074	14.3274	8.71585	0.00143744	0.975543
528	0.0218264	0.526779	13.4237	8.60289	0.00136165	0.987439
529	0.0654774	0.642781	19.007	10.9981	0.0105431	0.981298
530	0.0295427	0.616197	17.3493	11.2089	0.0017215	0.985491
531	0.0100146	0.465206	12.0315	4.55191	0.000547273	0.915257
532	0.0110691	0.432429	10.2649	4.75847	0.000613366	0.926957
533	0.0269674	0.568001	14.7914	8.20654	0.00132749	0.968723
534	0.0151147	0.462032	11.4284	6.80809	0.000880472	0.96244
535	0.0261587	0.53476	14.1681	9.18853	0.00146091	0.984488
536	0.040007	0.620892	18.1272	12.2147	0.00319057	0.996381
537	0.0172509	0.488495	11.5213	5.91481	0.000996093	0.944865
538	0.0392484	0.628553	19.6333	14.026	0.00478133	0.983889
539	0.0117541	0.509542	12.6429	5.02867	0.000638528	0.933558
540	0.0522215	0.678597	21.3605	12.8057	0.00753482	0.992974
541	0.0133273	0.470829	12.6502	6.42474	0.000704325	0.94578
542	0.0447396	0.623676	19.4798	13.2628	0.00475683	0.98683
543	0.0449098	0.631058	16.9734	10.8528	0.00365904	0.996157
544	0.0218785	0.601349	14.7013	8.63121	0.00130778	0.98993
545	0.00977579	0.441515	11.3312	4.79567	0.000538642	0.923991
546	0.0263437	0.53382	13.6211	8.75333	0.00157445	0.980355
547	0.0423613	0.691762	21.7304	14.0416	0.00389671	0.990842
548	0.0311934	0.520118	14.2395	10.048	0.00197825	0.992449
549	0.0213601	0.521085	13.2149	8.24899	0.00125241	0.982499
550	0.0304277	0.598133	14.9466	10.0025	0.00213369	0.997047
551	0.0156701	0.500613	12.743	6.75063	0.00088574	0.955556
552	0.0448223	0.60934	15.606	9.46301	0.0030145	0.982215
553	0.0415914	0.668652	20.3963	13.2277	0.00387931	0.994808
554	0.0248728	0.542463	14.9676	10.0857	0.00147675	0.983604
555	0.0370109	0.619109	16.4091	10.6896	0.00266108	0.993568
556	0.0417563	0.605469	17.1386	11.8419	0.00401921	0.991739
557	0.0411004	0.622827	19.7685	13.9746	0.00465915	0.989981
558	0.029804	0.553597	15.4028	11.1145	0.00216121	0.994711
559	0.0204981	0.584967	16.4638	10.7039	0.00118995	0.988034
560	0.0370405	0.607261	17.855	12.0433	0.00267291	0.990983
561	0.0218677	0.596623	13.8929	7.47309	0.0012513	0.971534
562	0.00676609	0.456414	13.1831	4.4597	0.000407722	0.919566
563	0.0401909	0.631621	17.204	11.8632	0.00388813	0.979716
564	0.0317092	0.54674	14.4284	10.0203	0.00226377	0.990608
565	0.0682744	0.636002	19.0598	10.8263	0.0149822	0.925131
566	0.0155865	0.469184	11.4284	5.81231	0.000879977	0.943435
567	0.0135929	0.501681	12.9518	6.34327	0.000761468	0.949608
568	0.021548	0.343255	6.39945	4.9395	0.00111987	0.952639
569	0.0183265	0.4956	12.8337	7.18144	0.000951632	0.954098
570	0.00736519	0.462052	11.5508	2.97235	0.000388164	0.855968
571	0.0406618	0.588105	14.9559	9.5952	0.00287438	0.993266
572	0.037247	0.619409	17.922	11.9808	0.00270095	0.996401
573	0.0219874	0.51964	15.7321	11.0328	0.00122617	0.976714
574	0.016235	0.51105	13.5487	7.53006	0.000892456	0.959066
575	0.02262	0.514887	12.6302	8.20862	0.00123603	0.971586
576	0.0271295	0.514647	15.278	10.4023	0.00140877	0.980338
577	0.016445	0.524023	11.9992	5.00612	0.000797267	0.922125
578	0.0442807	0.700373	20.7392	12.7281	0.00431331	0.990788
579	0.0204942	0.56626	13.6849	7.05299	0.00105194	0.949848
580	0.028842	0.606823	15.6683	9.81866	0.00173928	0.986048
581	0.023909	0.554797	15.2099	9.75633	0.00135861	0.978402
582	0.023896	0.540693	13.3447	7.99229	0.00135767	0.971427
583	0.0173165	0.589956	12.3971	5.11831	0.000967521	0.945373
584	0.0666644	0.616877	17.3479	10.058	0.00951349	0.992196
585	0.0374909	0.52484	14.3727	10.3085	0.00275701	0.992845
586	0.0214434	0.528	13.9781	8.61988	0.00118248	0.972119
587	0.0142697	0.518866	14.7231	8.72991	0.000806236	0.97422
588	0.0346878	0.527373	14.7429	12.9058	0.00277462	0.99262
589	0.0277838	0.514927	12.145	7.75845	0.0017005	0.984389
590	0.024931	0.559638	12.4704	6.1337	0.00117616	0.943074
591	0.0531752	0.666403	18.9062	11.4944	0.00721392	0.989351
592	0.0118053	0.431583	10.2084	4.68401	0.000603721	0.920699
593	0.0284266	0.546738	14.8636	9.7218	0.0015877	0.977462
594	0.0156476	0.500821	12.8508	6.61356	0.000840219	0.952446
595	0.0240748	0.524508	15.4523	10.6781	0.00132379	0.982746
596	0.0502796	0.653715	20.7357	12.9644	0.00682805	0.985344
597	0.0562201	0.643957	20.3638	12.1577	0.00859122	0.995317
598	0.0313208	0.569831	14.3705	9.29276	0.00193439	0.99568
599	0.0296655	0.561212	15.9031	10.4901	0.00162223	0.987943
600	0.0358439	0.582515	17.2791	12.4058	0.00274366	0.996413
601	0.0331244	0.647384	16.9699	10.601	0.00210511	0.994067
602	0.0175711	0.422969	11.2468	9.61628	0.000916107	0.970808
603	0.0394183	0.665463	18.5179	12.3438	0.00387322	0.994757
604	0.0633045	0.705002	23.0081	12.5409	0.0137922	0.934414
605	0.0203556	0.510874	12.4427	6.84432	0.00109624	0.95296
606	0.0262457	0.549672	15.6356	10.1762	0.00142054	0.98387
607	0.0231962	0.540694	15.7092	11.0398	0.00140173	0.988265
608	0.0122652	0.370248	8.28388	4.50086	0.000615131	0.92056
609	0.0429383	0.624959	18.3477	12.0882	0.00384139	0.996522
610	0.0248118	0.548052	14.3502	8.71883	0.00131411	0.968877
611	0.0329275	0.581705	15.3794	10.0843	0.0020843	0.990739
612	0.0430104	0.621991	18.4997	12.8843	0.00455103	0.979906
613	0.0505298	0.658021	17.3623	10.3709	0.00443266	0.996129
614	0.0364087	0.555772	16.6422	11.8911	0.00266506	0.993542
615	0.0285263	0.555773	14.7902	10.0427	0.0017748	0.995729
616	0.0128344	0.517196	12.5311	5.39936	0.000727985	0.943312
617	0.0314914	0.607644	17.6345	12.5858	0.00243083	0.998536
618	0.0291834	0.531547	14.1251	9.39365	0.00173214	0.982823
619	0.0304396	0.591277	15.1365	9.31008	0.00173163	0.988858
620	0.014412	0.545599	12.6891	5.27732	0.000761023	0.939859
621	0.0337328	0.550435	14.7537	10.7844	0.00274133	0.997851
622	0.0341658	0.6527	19.1148	13.0594	0.00285601	0.997489
623	0.0338061	0.605721	17.1403	12.0231	0.00266313	0.996967
624	0.0308139	0.547486	14.4911	9.31505	0.0017635	0.981804
625	0.0475391	0.633045	17.863	11.4676	0.00456605	0.996173
626	0.0353289	0.561188	15.5096	10.7235	0.0024753	0.995042
627	0.0263842	0.606507	17.3964	11.746	0.00159131	0.995852
628	0.0538736	0.700351	20.7628	12.3469	0.00674627	0.963452
629	0.0255915	0.543687	13.8213	9.07338	0.00163717	0.989216
630	0.0329854	0.59144	16.6177	11.5802	0.00255504	0.993475
631	0.0458066	0.616386	17.6681	11.8435	0.00467906	0.991792
632	0.0405302	0.627272	16.2492	10.1007	0.00284378	0.990948
633	0.0538348	0.619328	18.768	11.9688	0.00671375	0.987279
634	0.024265	0.558456	14.6762	9.32594	0.00141715	0.98558
635	0.0234491	0.534632	13.027	6.96078	0.00108803	0.94595
636	0.0260738	0.533979	13.103	8.28754	0.00158313	0.985155
637	0.0392486	0.601126	16.7725	11.4945	0.00325376	0.997626
638	0.0241363	0.531926	13.2	8.63582	0.00160046	0.985575
639	0.037347	0.544388	15.7439	11.9693	0.00340244	0.987216
640	0.0274057	0.531479	15.0175	10.8538	0.00182612	0.989717
641	0.0244179	0.568571	16.0265	10.9491	0.00150598	0.987885
642	0.0227211	0.519308	12.8599	9.07945	0.00151773	0.991075
643	0.0139513	0.49054	14.0192	8.0843	0.000776045	0.962199
644	0.0353147	0.650234	20.1076	13.9398	0.00304166	0.993585
645	0.0314339	0.610992	16.5969	10.8334	0.00194946	0.995896
646	0.0557173	0.695118	20.9707	12.292	0.00848563	0.958401
647	0.0315856	0.536431	13.9635	9.68346	0.00216752	0.993993
648	0.044475	0.641699	19.3062	12.8033	0.00407173	0.992862
649	0.0350024	0.513627	12.9325	8.41585	0.00202328	0.982338
650	0.0086676	0.501069	13.0612	3.94745	0.000481706	0.904342
651	0.0373714	0.629883	19.9881	13.8039	0.0032056	0.994871
652	0.0124687	0.424533	10.4275	5.82008	0.000680326	0.947414
653	0.0719478	0.69436	21.3804	10.4923	0.0131046	0.975133
654	0.0211845	0.512227	13.3438	7.90841	0.00113599	0.959585
655	0.0110448	0.450891	11.3114	4.86793	0.000579096	0.9182
656	0.0399712	0.642817	18.7219	12.2922	0.00319897	0.995981
657	0.0201356	0.56274	15.0327	9.36497	0.00119222	0.986641
658	0.0342866	0.559788	14.6009	9.78658	0.00233839	0.98826
659	0.0375439	0.635078	16.4065	10.5625	0.00276725	0.997135
660	0.00791972	0.483664	12.2789	3.36934	0.000395125	0.87496
661	0.0081582	0.488574	12.6337	3.7617	0.000436591	0.897716
662	0.0264005	0.523132	11.8417	6.72738	0.00148748	0.966526
663	0.029302	0.503204	10.8109	6.78503	0.00185969	0.983484
664	0.0583975	0.684871	21.4156	12.3462	0.0103958	0.990093
665	0.0251964	0.57363	13.038	6.80872	0.00131344	0.960143
666	0.0441443	0.610511	15.6894	9.88579	0.0032732	0.994166
667	0.0301437	0.592632	14.6898	9.4676	0.00202695	0.993348
668	0.0375653	0.556925	14.3001	9.82106	0.00282322	0.997605
669	0.0280554	0.545087	13.0704	7.30631	0.00133578	0.953988
670	0.0483632	0.665943	20.6281	12.8963	0.00556769	0.988153
671	0.0395725	0.651784	18.9629	12.6034	0.0034844	0.996863
672	0.0453429	0.617068	19.1949	13.2047	0.00519421	0.966076
673	0.0394357	0.63268	19.2754	13.5103	0.0040764	0.989712
674	0.0334755	0.608982	15.3976	10.1963	0.0024227	0.997175
675	0.0300276	0.560926	14.5452	9.76471	0.00198253	0.992714
676	0.017865	0.552752	15.812	10.5268	0.00106373	0.990099
677	0.0225522	0.507631	14.4037	10.3521	0.00138758	0.993249
678	0.0407797	0.588624	13.7765	8.39801	0.00262484	0.990562
679	0.0157152	0.494141	12.2995	6.56606	0.000884823	0.960177
680	0.00881642	0.461422	13.737	5.30478	0.000446424	0.914264
681	0.0438104	0.574465	16.3479	11.3201	0.00416114	0.993653
682	0.0258333	0.530689	13.4047	8.64374	0.00161062	0.980344
683	0.0447335	0.632358	18.0362	12.0567	0.00481195	0.990294
684	0.0510972	0.604422	17.1779	11.0711	0.00470745	0.993538
685	0.0201678	0.573947	15.1304	8.86671	0.00110882	0.972522
686	0.0339937	0.607075	15.882	10.242	0.0021782	0.99515
687	0.0217152	0.53758	16.1054	11.7187	0.00134725	0.992443
688	0.0298196	0.5649	15.199	10.5361	0.00205551	0.994546
689	0.0422845	0.624362	18.6938	12.0654	0.00306693	0.992142
690	0.0356658	0.595691	16.6225	10.9375	0.00230877	0.99173
691	0.00969136	0.423826	10.2591	4.71845	0.00057046	0.934881
692	0.0362052	0.60476	16.551	11.4206	0.00280282	0.995697
693	0.0210127	0.549284	15.3763	9.99901	0.00115848	0.984649
694	0.0217228	0.535146	14.1459	8.56314	0.00113382	0.973612
695	0.0390182	0.654417	21.3718	15.1797	0.00480447	0.977263
696	0.0590012	0.686811	20.0046	11.4829	0.00877257	0.981553
697	0.014096	0.468662	12.0306	6.13499	0.000800472	0.949053
698	0.0286706	0.52963	14.8352	10.5881	0.00185637	0.992334
699	0.0137484	0.49371	11.1212	4.36694	0.000734092	0.91222
700	0.00799469	0.507489	13.0914	3.82659	0.000444215	0.906273
701	0.024897	0.561118	15.268	10.7419	0.00167559	0.997838
702	0.0372423	0.601334	17.3917	11.6935	0.00285283	0.987767
703	0.0341364	0.592615	16.1803	11.2305	0.00255077	0.997303
704	0.0118099	0.476678	11.1999	4.16505	0.000606957	0.902584
705	0.0215383	0.512173	12.4943	7.06669	0.00113748	0.958872
706	0.0231053	0.537176	14.78	9.59515	0.00125071	0.981559
707	0.0372074	0.604944	15.0096	9.5634	0.00261742	0.99325
708	0.0338994	0.570606	15.8607	11.5139	0.0026649	0.996251
709	0.0411299	0.569114	14.9367	9.73781	0.00277931	0.992475
710	0.0231771	0.535182	14.8652	10.2513	0.0014495	0.98853
711	0.0179773	0.494934	11.4487	5.15455	0.000904436	0.940665
712	0.0258193	0.620706	15.3842	9.05949	0.00151783	0.977396
713	0.00953162	0.427683	10.3967	4.11309	0.000509164	0.907749
714	0.0488798	0.685624	21.2797	13.1372	0.00634693	0.989884
715	0.041305	0.651756	20.0992	13.5927	0.00448111	0.994309
716	0.0547794	0.702936	20.2643	11.8259	0.0077223	0.984802
717	0.0102454	0.474967	13.6508	6.49083	0.000554093	0.944141
718	0.0341402	0.665586	17.9208	11.4771	0.0024906	0.993973
719	0.0497216	0.634954	17.2216	10.5875	0.00447657	0.998382
720	0.0260805	0.545654	12.224	7.00219	0.00155627	0.976107
721	0.00898853	0.503765	11.9364	3.57419	0.000497369	0.899582
722	0.0215712	0.349527	8.25173	8.59907	0.00123171	0.983042
723	0.0349062	0.520358	13.7954	9.62044	0.00220652	0.996148
724	0.0364215	0.572326	17.0486	12.5665	0.0034401	0.99774
725	0.0326529	0.567671	16.9192	12.2815	0.00229516	0.998479
726	0.010673	0.389537	9.00221	4.19116	0.000597893	0.9013
727	0.0224655	0.537261	14.2909	9.17507	0.00130048	0.984538
728	0.0607359	0.631335	15.9255	9.12606	0.00575431	0.988604
729	0.0139374	0.364564	7.96759	4.72938	0.000649382	0.935428
730	0.024694	0.561165	17.3732	13.1876	0.00175979	0.990042
731	0.0464402	0.635532	19.4908	13.1465	0.00553994	0.973374
732	0.0349469	0.59958	16.3765	10.9735	0.0023547	0.99777
733	0.0086557	0.425811	11.2465	4.68527	0.000435189	0.941253
734	0.0190842	0.563091	16.235	10.8898	0.00115221	0.985549
735	0.0312807	0.651723	20.1188	14.6479	0.00287961	0.995881
736	0.021882	0.498605	13.5029	9.17825	0.00132494	0.987738
737	0.0629185	0.835896	26.5244	13.2608	0.0155011	0.962363
738	0.0262419	0.543291	14.1819	9.2445	0.00155586	0.987035
739	0.0340688	0.56869	15.322	9.78886	0.0019278	0.980345
740	0.0138223	0.530251	14.082	7.01953	0.000766248	0.952457
741	0.0352883	0.566237	14.913	10.196	0.00248073	0.998245
742	0.0218585	0.550815	13.5916	7.59764	0.00114513	0.963112
743	0.0266458	0.490735	11.7468	7.1661	0.00138598	0.965723
744	0.0452566	0.640127	15.7658	9.42825	0.00337725	0.985634
745	0.0475398	0.632006	18.1648	11.6639	0.00448131	0.994335
746	0.0258078	0.553225	13.935	8.34464	0.00143273	0.96979
747	0.0138833	0.568596	12.0496	4.07075	0.000742493	0.913274
748	0.0341645	0.624196	16.0812	10.2546	0.00228855	0.994572
749	0.0530496	0.719592	24.3312	14.0557	0.0107813	0.981836
750	0.0230752	0.581944	17.5789	12.5169	0.00141183	0.992042
751	0.0355335	0.639717	17.3883	11.4577	0.0026807	0.997753
752	0.0421893	0.615319	16.4892	10.7748	0.00340807	0.9952
753	0.00788541	0.421059	9.36327	3.48603	0.00049164	0.909574
754	0.0295558	0.544782	14.4401	9.80002	0.00184687	0.994355
755	0.0403246	0.609706	18.419	12.7949	0.00367175	0.994201
756	0.0300989	0.59703	16.5502	11.16	0.00188327	0.995621
757	0.043747	0.670166	19.8483	12.7098	0.00431385	0.994043
758	0.0469048	0.6541	20.955	13.5185	0.00617847	0.992779
759	0.0237165	0.525754	14.2554	9.89973	0.00151792	0.992398
760	0.0420792	0.634131	18.6973	12.275	0.00373613	0.997847
761	0.00561927	0.404658	8.90712	1.449	0.000367602	0.773284
762	0.029789	0.566115	14.6339	9.43448	0.00178083	0.988299
763	0.0154644	0.504625	13.0252	6.99767	0.000888739	0.953474
764	0.0443938	0.675528	19.5843	12.321	0.00445691	0.990151
765	0.021996	0.472665	10.5858	5.88775	0.00120999	0.948567
766	0.035449	0.650321	20.6085	13.6568	0.00246919	0.987433
767	0.0252437	0.547953	14.9271	9.84093	0.00145886	0.985283
768	0.0216261	0.570566	16.6039	10.9345	0.00121828	0.973873
769	0.00973753	0.430702	11.287	4.76486	0.000550659	0.919358
770	0.0540996	0.738472	24.6609	13.4981	0.0111384	0.979834
771	0.0374831	0.558435	15.8407	11.4665	0.00287858	0.992861
772	0.0300974	0.532897	13.8366	9.24224	0.00185494	0.985913
773	0.0227905	0.528935	13.2979	7.93742	0.00130615	0.967185
774	0.00774467	0.445559	11.5686	3.55875	0.000415701	0.874838
775	0.0161195	0.54093	14.6812	8.30213	0.000883468	0.970382
776	0.0307776	0.572777	14.57	9.28516	0.00180566	0.992043
777	0.0125141	0.442624	11.535	6.37495	0.000686126	0.947637
778	0.0261713	0.606621	16.9971	10.7807	0.00145371	0.977007
779	0.0419499	0.662369	20.4289	13.4224	0.00399915	0.991576
780	0.0253039	0.537	14.2368	9.75645	0.00164343	0.989591
781	0.0361774	0.534358	13.2136	8.72934	0.002344	0.988246
782	0.0420837	0.633076	19.3333	12.9356	0.00373674	0.995582
783	0.0201415	0.549739	15.6855	10.7888	0.0012608	0.98773
784	0.0347465	0.62327	17.4053	12.1544	0.00287885	0.997554
785	0.0216341	0.58016	15.8102	10.1219	0.00126373	0.98976
786	0.0497737	0.601214	16.0804	10.616	0.00542939	0.992704
787	0.0370506	0.560772	14.7485	9.46543	0.00212046	0.988479
788	0.0519375	0.73729	24.1779	14.0582	0.00974826	0.981287
789	0.0272361	0.579487	14.6878	9.44122	0.00173631	0.989368
790	0.0386079	0.612731	17.0135	11.1096	0.00261065	0.988842
791	0.018518	0.552828	13.8881	7.82364	0.00105494	0.978896
792	0.00982697	0.353494	7.71913	3.99417	0.000541321	0.932913
793	0.00950333	0.500417	13.2742	4.55062	0.000483475	0.912839
794	0.0394571	0.579683	16.5769	11.4851	0.003317	0.993398
795	0.0212074	0.50842	12.4025	6.99746	0.00117125	0.956558
796	0.0331334	0.62774	18.2171	12.7958	0.00279081	0.996127
797	0.060017	0.719744	21.9534	11.7	0.00713583	0.990514
798	0.0413218	0.613975	15.9233	10.5751	0.00346667	0.996744
799	0.0296042	0.57991	15.7191	11.1155	0.00228608	0.992583
800	0.018357	0.523898	14.735	9.33964	0.00102536	0.975153
801	0.0319846	0.647906	16.9127	10.4868	0.00202685	0.989079
802	0.0170552	0.49431	12.5047	5.75966	0.00082385	0.949272
803	0.050746	0.654275	21.6026	13.9468	0.0111669	0.963693
804	0.0422884	0.596186	16.0628	10.6914	0.0032974	0.998583
805	0.0212567	0.561616	14.6546	8.67186	0.00119583	0.97264
806	0.0307618	0.539557	14.5603	10.1426	0.00197645	0.993868
807	0.0183829	0.488939	13.0791	8.23156	0.00106508	0.974992
808	0.0231092	0.519827	14.9672	10.6063	0.0014251	0.980832
809	0.0632398	0.680215	22.209	12.5693	0.0134152	0.969884
810	0.0346	0.602011	17.0234	11.433	0.00223366	0.992403
811	0.0413066	0.661537	20.8304	13.6192	0.00338774	0.980613
812	0.0479883	0.705636	21.389	13.3604	0.0075065	0.949768
813	0.0161708	0.47566	11.3735	5.45284	0.000819956	0.929085
814	0.0238309	0.586802	14.4151	8.80652	0.00150703	0.98351
815	0.0368296	0.563918	13.6253	8.65303	0.00240802	0.987906
816	0.0192812	0.518721	13.1259	7.13224	0.000944299	0.95443
817	0.0333877	0.563331	16.9155	12.2693	0.00238018	0.9963
818	0.0294201	0.538249	14.5879	10.021	0.00187891	0.987399
819	0.0396203	0.540935	13.8885	9.30227	0.00268447	0.992275
820	0.0323328	0.595709	17.9478	12.5608	0.0020792	0.989646
821	0.0209921	0.525291	13.5602	7.79737	0.00104977	0.960012
822	0.0275097	0.59493	15.9696	10.5195	0.00170217	0.994978
823	0.040615	0.628496	17.5178	11.4554	0.00321414	0.997356
824	0.0624437	0.727966	22.8394	12.1826	0.0126723	0.961794
825	0.0251918	0.582154	17.6417	11.9422	0.00141	0.97741
826	0.0188961	0.51055	14.8235	9.94029	0.00104656	0.981479
827	0.0318618	0.576183	15.489	10.0134	0.00187873	0.982793
828	0.00750175	0.417484	9.97154	3.1915	0.000409293	0.870343
829	0.030172	0.580629	15.9129	10.4239	0.00180122	0.984713
830	0.0573293	0.703376	22.4948	12.6557	0.00743437	0.99
831	0.0506554	0.671734	19.5512	11.6751	0.0039517	0.983396
832	0.0193318	0.517806	13.3932	8.3422	0.00115649	0.98115
833	0.0450194	0.635979	17.4379	11.091	0.00397601	0.996168
834	0.0370198	0.640484	19.8889	13.7738	0.00307099	0.994145
835	0.033259	0.585886	15.6977	10.855	0.00240999	0.996227
836	0.031313	0.58285	17.161	12.7325	0.00253758	0.997575
837	0.0188885	0.543314	14.7974	8.99278	0.00102673	0.974861
838	0.0168576	0.521905	13.361	7.28386	0.000892138	0.964548
839	0.0327588	0.61648	13.727	7.24764	0.00164772	0.967568
840	0.0575829	0.70508	21.3113	12.3028	0.00968471	0.95899
841	0.034597	0.542843	15.7242	11.3321	0.00245935	0.997117
842	0.0388849	0.634107	18.061	12.124	0.00326866	0.997755
843	0.0469401	0.638535	17.0242	10.9208	0.00446598	0.993222
844	0.0329028	0.585671	13.6925	8.58718	0.00216287	0.996999
845	0.0317597	0.564478	17.1843	13.0105	0.00263121	0.994038
846	0.0498544	0.594912	16.9263	11.2789	0.00527518	0.984672
847	0.0261233	0.548044	14.499	9.51318	0.00153061	0.990371
848	0.0223825	0.528046	13.5861	8.23993	0.00123253	0.970433
849	0.0249385	0.554679	15.3888	10.5566	0.00150697	0.995391
850	0.0335407	0.646131	18.3388	12.411	0.0024752	0.997866
851	0.00874868	0.41909	9.9378	3.68723	0.000421302	0.899384
852	0.0527328	0.678961	19.6558	12.0308	0.00586361	0.991465
853	0.0477115	0.628748	20.1013	13.2378	0.00600384	0.990675
854	0.0394374	0.593187	16.1771	10.8166	0.00306555	0.993836
855	0.0347391	0.583732	16.9335	12.1974	0.00276952	0.993855
856	0.0334374	0.554847	14.8767	10.3442	0.00237038	0.993234
857	0.0241246	0.532774	14.7877	10.4488	0.00153213	0.994577
858	0.00777025	0.393437	10.6127	4.91542	0.000409957	0.930388
859	0.0284243	0.608592	15.7875	9.85001	0.00164761	0.993593
860	0.0522261	0.675509	21.0298	12.7635	0.00723249	0.989447
861	0.0286768	0.557569	15.5431	10.4328	0.00169197	0.985754
862	0.0352911	0.593213	16.2319	11.0586	0.00262232	0.99391
863	0.0489991	0.705657	21.4063	12.7286	0.00524917	0.990102
864	0.0221445	0.523274	15.192	11.0073	0.00143346	0.989507
865	0.0175393	0.514331	11.1284	4.7085	0.000874986	0.938424
866	0.0503349	0.701984	21.5685	13.583	0.00870506	0.926158
867	0.00391997	0.424991	12.0168	0.732008	0.000234274	0.798799
868	0.0368025	0.603427	17.3321	11.9191	0.0030142	0.995053
869	0.0406863	0.579551	16.0342	10.8009	0.00300839	0.996701
870	0.0604555	0.624408	20.6369	12.3588	0.0111074	0.967826
871	0.0320118	0.569776	15.8885	11.4149	0.00249486	0.996724
872	0.0169015	0.520565	16.6862	12.5222	0.00102601	0.993616
873	0.028736	0.582576	15.6134	9.93957	0.00161493	0.987943
874	0.0291394	0.55355	16.2984	12.0663	0.00209606	0.994093
875	0.0323939	0.579146	15.9703	10.9301	0.00216066	0.994637
876	0.0284875	0.541784	15.4582	10.5809	0.00169887	0.977311
877	0.0219694	0.497357	13.2155	8.4618	0.00122492	0.97692
878	0.0275782	0.558914	16.5948	12.042	0.001803	0.993818
879	0.0168556	0.498104	13.8287	7.64306	0.000863389	0.976825
880	0.0201929	0.51292	11.6839	5.10647	0.000889243	0.928215
881	0.029843	0.509491	12.7617	9.95491	0.00197637	0.99482
882	0.0167007	0.533709	13.8466	7.75885	0.000831478	0.955815
883	0.0357943	0.603158	17.3283	12.387	0.00327635	0.996652
884	0.0237595	0.540737	13.5768	7.92117	0.00121251	0.965884
885	0.0285966	0.546897	13.2994	8.66224	0.00188025	0.992256
886	0.0173998	0.543326	15.4801	9.03626	0.000905173	0.96146
887	0.046474	0.696943	21.0328	13.2707	0.00613235	0.936917
888	0.0590625	0.670588	20.4393	11.5727	0.010031	0.989649
889	0.0436136	0.56495	15.8358	11.0062	0.00382518	0.994138
890	0.0154065	0.512293	13.9142	8.20144	0.000908478	0.975408
891	0.055987	0.675348	20.0967	11.6739	0.00637876	0.988978
892	0.0166236	0.346653	6.99376	5.18243	0.000948538	0.955965
893	0.0242258	0.555639	14.5086	8.72148	0.00125043	0.975881
894	0.0255922	0.574766	14.7863	9.42997	0.00159074	0.98722
895	0.0318907	0.656948	20.2331	14.6346	0.00297637	0.99474
896	0.0308731	0.585736	15.6633	10.7193	0.00212983	0.996234
897	0.0506728	0.745249	23.5337	13.6006	0.00614354	0.992307
898	0.00995542	0.507731	12.5304	4.45812	0.000567494	0.926104
899	0.0179707	0.503657	12.7945	9.08727	0.00109943	0.973994
900	0.0182271	0.492059	13.4939	8.32914	0.00102041	0.961518
901	0.0399748	0.622691	19.91	13.7014	0.00379831	0.996628
902	0.0397347	0.607279	16.0425	10.4066	0.00274033	0.995891
903	0.0558091	0.642264	21.028	12.5796	0.00933522	0.99383
904	0.0690247	0.639792	17.9462	9.94227	0.00933758	0.993631
905	0.0170414	0.532323	15.371	9.22032	0.000862768	0.968544
906	0.0456054	0.609622	19.2246	13.4688	0.00610257	0.969937
907	0.0234027	0.591275	15.4756	9.63843	0.00137726	0.981876
908	0.0344824	0.603117	19.6486	14.5635	0.00301256	0.993278
909	0.0389343	0.57916	16.664	11.8592	0.0033499	0.992845
910	0.0276455	0.549678	13.3971	8.15414	0.00161345	0.975088
911	0.0143114	0.362149	7.28958	4.37084	0.000751464	0.935422
912	0.0233856	0.595764	13.9118	6.88147	0.00119048	0.975886
913	0.0364708	0.659403	17.9554	11.4577	0.00250343	0.996158
914	0.0177226	0.475135	11.9612	6.71845	0.000993042	0.95267
915	0.0260757	0.550389	14.462	9.06292	0.00140171	0.977945
916	0.0195169	0.543207	14.3555	7.61987	0.000913676	0.969704
917	0.030889	0.615892	17.1245	11.5528	0.00208157	0.997043
918	0.0403312	0.607089	18.4781	12.4527	0.00316266	0.996596
919	0.0277707	0.52125	14.6882	10.8522	0.00185108	0.997156
920	0.0187199	0.520949	13.5054	7.03686	0.000888547	0.938587
921	0.0199629	0.481649	11.9596	7.24217	0.00112559	0.969163
922	0.0405038	0.604526	17.5407	11.6092	0.00270651	0.983668
923	0.0382255	0.614342	18.0422	12.7622	0.00338436	0.98597
924	0.019932	0.454672	10.1898	5.85938	0.00104824	0.946581
925	0.0271378	0.536592	14.0866	9.00148	0.0015134	0.975899
926	0.0538237	0.677474	20.0196	12.2092	0.0081706	0.963576
927	0.0217744	0.513544	13.3296	8.23178	0.0011947	0.974617
928	0.0371514	0.621242	16.1126	10.592	0.00287372	0.997202
929	0.0136256	0.503982	13.977	8.09283	0.000802596	0.97567
930	0.0610862	0.859327	30	13.467	0.0139601	0.948433
931	0.0534707	0.706016	22.9202	13.5663	0.0106814	0.949133
932	0.0338204	0.619433	15.4941	9.52483	0.00207107	0.992644
933	0.0494232	0.615928	17.1518	11.0884	0.004835	0.995588
934	0.0402204	0.66625	18.7832	12.0432	0.00339477	0.989059
935	0.0297554	0.558967	13.5745	8.58226	0.00185924	0.989092
936	0.0190005	0.529894	13.5923	7.52025	0.0010148	0.960014
937	0.0452474	0.650962	17.2752	10.6344	0.00387519	0.99388
938	0.0383303	0.596613	18.0065	12.8041	0.00303771	0.994389
939	0.0287751	0.549958	14.8428	9.88738	0.00173675	0.985891
940	0.0334289	0.569295	16.5857	12.3762	0.00287055	0.996171
941	0.00454497	0.501944	13.263	1.23687	0.000266697	0.823505
942	0.0204196	0.548818	14.3896	8.7538	0.00115622	0.983103
943	0.0562116	0.694849	20.925	12.2942	0.00651873	0.993005
944	0.0610712	0.745409	26.368	14.3649	0.0308455	0.773799
945	0.0484443	0.652104	18.6822	12.0461	0.00603469	0.977966
946	0.0437334	0.595957	14.4788	9.19587	0.00362116	0.993218
947	0.00926754	0.368466	8.76108	4.10206	0.000450973	0.912575
948	0.00746208	0.368175	8.31743	3.28232	0.000414168	0.882216
949	0.06141	0.663723	19.7796	11.8931	0.0162164	0.906802
950	0.0106423	0.47273	12.6405	5.1908	0.000549769	0.925027
951	0.0226735	0.565392	16.8019	12.1139	0.00148675	0.987011
952	0.0437223	0.678639	20.3577	13.0019	0.00495194	0.992175
953	0.0252102	0.566724	16.3565	11.5456	0.0016051	0.992721
954	0.0284333	0.523457	12.7123	8.19952	0.00177484	0.987287
955	0.0219738	0.567961	14.3002	8.45939	0.00122896	0.981792
956	0.0349196	0.602528	16.7696	11.2625	0.00243619	0.994652
957	0.0211219	0.504672	12.6709	7.78251	0.00124987	0.970417
958	0.0498536	0.671437	18.6053	11.3313	0.00441629	0.991742
959	0.0325241	0.594808	17.4095	11.9224	0.00195496	0.995411
960	0.009308	0.444412	11.2512	4.40688	0.000480665	0.915534
961	0.0439535	0.642787	19.3189	12.7303	0.00398627	0.991328
962	0.0167302	0.488984	11.5983	5.84502	0.000915414	0.947999
963	0.0288698	0.594704	14.1655	8.75881	0.00186801	0.993951
964	0.0341475	0.579716	15.9704	10.4509	0.00204461	0.989525
965	0.0451585	0.611269	16.1453	10.6075	0.00384274	0.997598
966	0.0150925	0.51305	12.9753	6.20261	0.000792909	0.940937
967	0.0263574	0.622396	16.7153	11.6214	0.00195089	0.995975
968	0.0317104	0.584373	15.2071	10.514	0.00234902	0.998294
969	0.0264452	0.59223	17.2937	12.1171	0.00176151	0.98652
970	0.0264624	0.551543	16.191	11.8528	0.00173589	0.996139
971	0.0276472	0.600531	17.0804	10.8671	0.00148456	0.985881
972	0.0326715	0.535279	14.8405	10.9976	0.00240425	0.996643
973	0.0188697	0.473473	11.3651	4.73234	0.000904424	0.764015
974	0.0302529	0.576928	13.9421	8.52122	0.00184664	0.983938
975	0.0103793	0.367858	7.5627	3.73979	0.000588769	0.911648
976	0.0166328	0.502102	12.4715	6.41669	0.000898794	0.948922
977	0.0232261	0.585661	15.7949	10.3178	0.00141392	0.992394
978	0.0246638	0.52693	14.6246	9.85363	0.00139398	0.983265
979	0.0244065	0.577314	14.7072	9.10943	0.00144808	0.985202
980	0.0138573	0.503711	12.0431	4.90334	0.000717872	0.915096
981	0.0669217	0.704402	23.3183	12.5996	0.0131104	0.985297
982	0.0410562	0.610881	17.3372	11.554	0.0033849	0.996374
983	0.0199465	0.539627	14.9845	9.568	0.00111467	0.977219
984	0.0277868	0.492931	10.2625	5.6197	0.00144564	0.941581
985	0.036533	0.619469	15.5533	10.0451	0.00260188	0.992619
986	0.0420744	0.641194	17.4945	10.9689	0.00302296	0.996854
987	0.0275215	0.506718	13.7771	9.9612	0.00179578	0.995457
988	0.0362292	0.594718	17.7543	12.1472	0.00260485	0.992791
989	0.0212496	0.539911	13.7959	7.85924	0.00111292	0.966009
990	0.0284468	0.587564	17.5343	12.9594	0.00215501	0.996487
991	0.05208	0.736256	24.9757	14.3317	0.0110471	0.975504
992	0.0428522	0.614663	16.2839	10.8441	0.00392596	0.99655
993	0.0187626	0.506236	12.0466	6.88606	0.00114667	0.975718
994	0.0444656	0.623968	17.7654	11.3317	0.00382395	0.984864
995	0.0183588	0.54043	15.1782	10.3067	0.00119112	0.98385
996	0.0406089	0.624973	17.1348	11.268	0.00303207	0.993871
997	0.0418075	0.593556	16.4552	11.2906	0.00416099	0.996788
998	0.0440612	0.566129	16.4712	11.6953	0.00430904	0.988819
999	0.0343952	0.573427	13.2437	7.95987	0.00201897	0.986827
1000	0.0482219	0.652046	19.2106	12.1238	0.00436662	0.993644
1001	0.0428698	0.614244	17.4771	11.4412	0.00329829	0.998285
1002	0.0286111	0.546519	14.2381	8.87739	0.00151657	0.976294
1003	0.0101142	0.52817	13.6893	5.84626	0.000603704	0.953743
1004	0.056141	0.677933	21.0318	11.9801	0.00786743	0.975151
1005	0.0378973	0.622262	19.7274	14.2038	0.00377925	0.985391
1006	0.0116087	0.453197	12.7775	6.45524	0.000643344	0.941418
1007	0.0594744	0.711681	23.1654	13.1609	0.0125532	0.953407
1008	0.0270374	0.576704	14.9177	9.77752	0.00168744	0.994559
1009	0.0142496	0.539197	14.9343	8.48564	0.000811825	0.971862
1010	0.0214935	0.534664	13.6869	8.22214	0.00116032	0.977833
1011	0.0256282	0.532968	14.3913	9.94777	0.00161591	0.993372
1012	0.0506328	0.606757	16.8871	10.8384	0.00529354	0.990805
1013	0.0272094	0.547718	13.6193	8.56299	0.00158576	0.98718
1014	0.0366785	0.616973	18.3141	12.45	0.00275507	0.994549
1015	0.0517923	0.676966	19.3916	11.3606	0.0049838	0.991252
1016	0.0471106	0.644354	17.5863	11.0448	0.00413185	0.998186
1017	0.0319015	0.626655	17.3731	11.8246	0.00232777	0.998061
1018	0.0283761	0.598337	16.0026	10.1022	0.00167672	0.980326
1019	0.0257631	0.566778	15.4922	10.4033	0.00156566	0.993335
1020	0.00872994	0.410005	10.0043	4.03034	0.000456705	0.911815
1021	0.0547714	0.781255	25.3778	14.029	0.0186368	0.784797
1022	0.060956	0.640031	19.0932	11.2291	0.00830785	0.989205
1023	0.0197839	0.370426	7.76545	5.37571	0.000979278	0.934359
1024	0.0611501	0.653992	17.4061	9.77021	0.00618776	0.989118
1025	0.013179	0.401315	9.24716	5.93316	0.000726212	0.956315
1026	0.0290694	0.608951	15.0475	8.84716	0.00158395	0.984691
1027	0.028813	0.54566	15.9746	12.4958	0.0018645	0.991362
1028	0.0546209	0.741516	23.2417	13.248	0.0118377	0.958156
1029	0.00952406	0.451311	11.7996	5.30499	0.000584275	0.944495
1030	0.0283944	0.59402	16.0346	10.6017	0.00178938	0.991033
1031	0.00691122	0.396781	8.09338	2.19289	0.000390108	0.849421
1032	0.0192213	0.508158	12.3972	6.42578	0.000951872	0.945217
1033	0.0167536	0.536926	15.1427	9.47325	0.000923516	0.984307
1034	0.0373527	0.549216	15.0903	10.5678	0.00277577	0.994846
1035	0.0355743	0.586779	16.4174	11.2265	0.00256084	0.993646
1036	0.0391475	0.619707	18.3662	12.5157	0.00332108	0.997373
1037	0.053538	0.662239	19.7002	11.8708	0.00706243	0.993415
1038	0.0218951	0.552991	13.4105	7.81683	0.00135804	0.976022
1039	0.0476282	0.587573	17.2848	12.0295	0.00606413	0.980415
1040	0.026307	0.531784	14.3727	9.83851	0.00164289	0.983046
1041	0.0290774	0.546347	13.1358	8.109	0.00172639	0.980114
1042	0.0444891	0.645006	18.9358	11.9456	0.00365944	0.989517
1043	0.0512245	0.677753	19.1408	11.5473	0.00638168	0.988023
1044	0.0415543	0.61146	16.0697	10.2235	0.00310888	0.993701
1045	0.0246964	0.522227	13.3518	7.94395	0.0012656	0.979974
1046	0.0283619	0.547525	13.1572	8.11544	0.00169325	0.980817
1047	0.0389279	0.572708	14.3613	9.31117	0.00254497	0.996425
1048	0.0228357	0.511174	13.8205	8.32095	0.00107796	0.958623
1049	0.023365	0.53101	14.2945	9.64534	0.00142393	0.989075
1050	0.0227458	0.525112	14.0237	9.46124	0.00116304	0.973575
1051	0.0178889	0.537867	15.0409	9.18942	0.000987333	0.96926
1052	0.0105187	0.410012	8.19941	3.37403	0.000596772	0.872661
1053	0.0404869	0.630212	17.892	11.7843	0.00311034	0.996983
1054	0.0240614	0.575658	13.6438	7.97327	0.0014237	0.983819
1055	0.0247395	0.539579	12.4949	6.8014	0.00124255	0.960735
1056	0.0309556	0.58106	16.7477	11.4656	0.00193894	0.993252
1057	0.0335496	0.534388	13.6184	9.54056	0.00239801	0.997802
1058	0.013692	0.551886	16.4613	9.23856	0.000706658	0.954318
1059	0.00633966	0.400745	9.52683	2.37467	0.000365222	0.818435
1060	0.036676	0.597697	17.4098	12.1167	0.00286923	0.996484
1061	0.013266	0.487787	10.9622	4.28092	0.000709736	0.913381
1062	0.0310072	0.544965	14.1324	9.8263	0.00213295	0.996633
1063	0.0463298	0.628513	18.4948	11.7545	0.00439682	0.995093
1064	0.0164994	0.50307	12.5317	5.72474	0.000845728	0.955485
1065	0.0329983	0.652424	19.6164	13.6944	0.0026503	0.997271
1066	0.0467055	0.631868	18.4741	11.9427	0.00461093	0.996578
1067	0.0260805	0.495868	13.3397	9.77005	0.00179582	0.989786
1068	0.0140871	0.502962	14.4139	8.22434	0.000769977	0.956142
1069	0.0360059	0.561349	15.3318	10.8585	0.00264338	0.996888
1070	0.021451	0.515976	11.3037	5.3335	0.00110652	0.958172
1071	0.0158685	0.500301	12.8038	6.2195	0.000778619	0.936321
1072	0.0579816	0.684658	20.926	12.2263	0.00912484	0.975876
1073	0.0319094	0.618104	14.7879	8.32815	0.00169738	0.973737
1074	0.0521804	0.68562	21.5958	12.9424	0.00682128	0.97452
1075	0.0580405	0.69365	20.9115	11.866	0.00910433	0.98853
1076	0.0238295	0.524656	14.6893	9.8914	0.00136215	0.975616
1077	0.0444115	0.604317	16.3316	10.8062	0.00400099	0.997807
1078	0.0570937	0.664336	20.9813	12.1587	0.00682031	0.994768
1079	0.0270786	0.555735	14.8097	10.098	0.00172205	0.994359
1080	0.0616349	0.655595	18.0141	10.4551	0.00886882	0.979854
1081	0.0134961	0.502871	13.6377	7.17466	0.000759229	0.962743
1082	0.0188531	0.49964	12.9181	7.55075	0.00100648	0.964864
1083	0.00541214	0.448841	10.3823	1.40338	0.000326404	0.805933
1084	0.0278082	0.584861	17.0523	12.0064	0.00177447	0.998477
1085	0.0284328	0.599066	18.9349	14.0571	0.00206662	0.99615
1086	0.0285338	0.517049	15.8359	15.23	0.00216385	0.996149
1087	0.0183564	0.50271	13.5021	6.73845	0.000822025	0.956471
1088	0.0148765	0.49965	12.613	6.05422	0.000778061	0.936722
1089	0.0201126	0.573538	14.0881	7.88749	0.00112775	0.977111
1090	0.0225618	0.578226	14.8487	9.38621	0.00141013	0.989648
1091	0.0394495	0.618926	17.901	12.2961	0.00365398	0.997922
1092	0.0421017	0.640386	17.9428	11.984	0.00407916	0.995535
1093	0.0435141	0.595483	16.165	10.4883	0.00308827	0.991922
1094	0.0349713	0.617467	17.3677	11.6759	0.00257441	0.995812
1095	0.0240471	0.621648	16.0654	9.38475	0.00126059	0.985317
1096	0.0215286	0.560041	15.4344	9.74214	0.00120223	0.980073
1097	0.0417375	0.609209	14.5783	9.17123	0.00312461	0.996549
1098	0.0228672	0.541936	14.6294	9.15334	0.00126514	0.974789
1099	0.034922	0.600743	15.3152	9.50987	0.00207078	0.99069
1100	0.0128546	0.483059	11.37	4.83895	0.000652531	0.928675
1101	0.0184605	0.520712	11.5227	5.0765	0.000909078	0.924028
1102	0.042013	0.575644	17.1028	12.3007	0.00430384	0.993253
1103	0.0438126	0.677965	19.0469	11.8643	0.00369423	0.99751
1104	0.0239106	0.353101	7.82924	6.99667	0.00128357	0.967893
1105	0.0375907	0.596052	14.606	9.13158	0.00247029	0.991904
1106	0.00816246	0.441156	11.0262	3.6135	0.000462592	0.877367
1107	0.0468173	0.601912	15.9999	10.2212	0.00376737	0.99258
1108	0.0195454	0.550295	15.6515	10.379	0.00116878	0.980227
1109	0.0376833	0.586151	16.5218	11.3379	0.00280472	0.995661
1110	0.0332598	0.572824	16.3228	11.5928	0.0023894	0.995858
1111	0.041422	0.534617	15.1361	11.2337	0.00381477	0.997024
1112	0.00794379	0.48152	12.5567	3.59864	0.000404132	0.883785
1113	0.0437883	0.582949	15.7524	10.5774	0.0034303	0.998497
1114	0.0336	0.559736	14.595	9.97955	0.0023905	0.992747
1115	0.0572759	0.670916	21.5544	12.7273	0.0121545	0.933907
1116	0.0289424	0.56733	17.2765	12.8176	0.00209556	0.99225
1117	0.0321608	0.611822	16.812	11.6922	0.00247884	0.997073
1118	0.0380999	0.650448	19.3364	13.1779	0.00338093	0.995964
1119	0.0451962	0.6236	15.3401	9.66632	0.00376595	0.99613
1120	0.0239749	0.576669	15.3133	9.65233	0.00139623	0.982138
1121	0.0173231	0.504318	12.8538	6.51323	0.000862558	0.935485
1122	0.0320013	0.526513	14.8523	10.8645	0.00228867	0.992241
1123	0.0191217	0.562177	17.4652	12.5997	0.00112957	0.993066
1124	0.0261912	0.531775	13.8189	8.75126	0.00148496	0.975746
1125	0.0477488	0.657416	17.6672	10.9616	0.00392852	0.986713
1126	0.0204299	0.494069	12.4959	7.23508	0.0010523	0.957531
1127	0.0538934	0.648774	18.9633	11.4435	0.00682379	0.985445
1128	0.0320531	0.564063	16.2121	11.925	0.00245129	0.996204
1129	0.0229371	0.516041	12.3531	7.44424	0.0013836	0.974196
1130	0.0111625	0.398347	7.77513	3.49819	0.000629614	0.885437
1131	0.0353321	0.585085	15.4902	10.3215	0.0023645	0.99663
1132	0.0314428	0.548463	13.9768	9.18712	0.00189885	0.992867
1133	0.0221239	0.438055	9.67119	6.12704	0.00124211	0.950469
1134	0.00706078	0.477467	13.583	4.1155	0.000393875	0.907056
1135	0.0401236	0.614567	17.6244	11.9228	0.00339837	0.997216
1136	0.0592495	0.689876	21.0258	12.1413	0.0110876	0.957442
1137	0.0436769	0.585953	15.3611	10.2451	0.00377562	0.994671
1138	0.0206992	0.527724	14.376	9.01603	0.00114728	0.97472
1139	0.0322712	0.57232	17.7263	13.2591	0.00247746	0.993928
1140	0.0408053	0.613673	19.2611	13.3187	0.00367807	0.995928
1141	0.0139515	0.466247	12.295	6.55592	0.000745897	0.951324
1142	0.0337094	0.545479	13.5225	8.78177	0.00214959	0.98379
1143	0.0504123	0.601804	15.4563	9.76005	0.00467202	0.997009
1144	0.0378456	0.591213	16.4786	11.6947	0.00322434	0.988657
1145	0.0350625	0.628652	17.8594	11.8076	0.00236854	0.997997
1146	0.0344637	0.604778	16.1341	10.5608	0.00225818	0.995514
1147	0.0250793	0.551785	12.8539	7.19295	0.00136142	0.971335
1148	0.043035	0.602347	18.131	12.5787	0.00406911	0.990061
1149	0.043153	0.591149	16.4834	11.3375	0.00395754	0.996402
1150	0.0229378	0.573928	14.6299	9.09899	0.00134374	0.991622
1151	0.0400087	0.578833	14.9556	10.3444	0.00332687	0.996949
1152	0.0292652	0.583237	13.7312	8.30874	0.00173149	0.99404
1153	0.0225258	0.56067	15.5007	10.3745	0.00134526	0.991909
1154	0.0327806	0.60907	16.2001	10.6755	0.00224384	0.993825
1155	0.0376587	0.569705	14.4914	9.55604	0.00258487	0.994084
1156	0.0511832	0.675982	19.2347	11.6611	0.00490687	0.992886
1157	0.0277019	0.546599	14.4726	9.27953	0.0015676	0.976001
1158	0.0342508	0.619155	16.9776	11.6263	0.00260195	0.997563
1159	0.0250141	0.541761	15.7722	11.3251	0.00160043	0.986342
1160	0.0253325	0.535896	14.0961	10.0378	0.00143883	0.984846
1161	0.0480224	0.627808	17.8702	11.49	0.00509432	0.996004
1162	0.0094642	0.49357	10.9459	3.08212	0.000477983	0.861846
1163	0.0322751	0.585051	14.6558	10.1246	0.00258706	0.998162
1164	0.00757386	0.455397	12.6813	4.17726	0.000419881	0.904641
1165	0.024429	0.536626	14.5915	9.13872	0.00128035	0.967332
1166	0.0120484	0.526169	13.2684	5.94675	0.000680865	0.954651
1167	0.0280142	0.566281	15.778	10.1831	0.00152432	0.98671
1168	0.0447538	0.621998	18.0486	12.0405	0.00403803	0.992423
1169	0.0287802	0.607415	16.9368	11.557	0.00189556	0.99509
1170	0.018475	0.509865	11.1979	5.72834	0.0011205	0.959593
1171	0.0377936	0.62102	15.8676	10.3632	0.00284261	0.997649
1172	0.0329694	0.604424	15.3929	9.79041	0.00200836	0.996662
1173	0.0563502	0.622426	19.0587	12.1107	0.00846527	0.941134
1174	0.00949408	0.364663	7.87279	3.87591	0.000551524	0.93181
1175	0.0680027	0.790223	26.0516	12.6427	0.0210289	0.917014
1176	0.0215695	0.539753	13.8776	8.64397	0.00128609	0.981184
1177	0.0616588	0.698336	22.1698	12.2204	0.0124411	0.962412
1178	0.0356634	0.599793	17.4259	12.3182	0.00295923	0.996551
1179	0.0335985	0.568107	15.852	11.1973	0.00248831	0.995966
1180	0.0453373	0.623915	18.2434	11.8468	0.00413297	0.998721
1181	0.0310157	0.591996	16.2983	10.5389	0.00182831	0.985495
1182	0.0438961	0.607573	19.4908	13.5741	0.00543036	0.982813
1183	0.0419199	0.564863	15.8276	11.3976	0.00368338	0.992086
1184	0.037686	0.676511	19.9802	13.2822	0.00309145	0.991923
1185	0.0427967	0.729759	23.4081	15.4764	0.00652118	0.956877
1186	0.0342218	0.546651	13.6781	8.96921	0.00218315	0.987207
1187	0.05486	0.671606	18.6767	11.2371	0.00670433	0.981079
1188	0.0432561	0.58577	16.2037	11.1398	0.00381157	0.995616
1189	0.0339197	0.564163	15.4097	10.821	0.00251003	0.996826
1190	0.0203984	0.499032	15.7384	12.3743	0.00129101	0.995581
1191	0.05912	0.657933	19.3269	11.2555	0.0079096	0.988229
1192	0.0163097	0.542222	13.1862	6.03198	0.000828495	0.940309
1193	0.0541565	0.691329	20.5982	12.1753	0.00686917	0.98757
1194	0.0622085	0.673333	20.4719	11.7352	0.0115442	0.948573
1195	0.0333678	0.574556	15.0012	10.1501	0.00232305	0.996011
1196	0.0473465	0.607085	16.9445	10.8936	0.00370801	0.995336
1197	0.02828	0.5302	14.769	10.7881	0.00187536	0.99642
1198	0.0256784	0.657939	22.1832	16.6184	0.00176054	0.994544
1199	0.0328599	0.619279	14.3552	8.24829	0.00194635	0.982367
1200	0.0598203	0.645181	17.0004	10.2081	0.00659009	0.98199
1201	0.02661	0.538167	12.536	7.12642	0.00143457	0.968208
1202	0.0297645	0.546153	13.3707	8.64727	0.0019225	0.987654
1203	0.0216394	0.542491	13.9127	8.50189	0.00122686	0.97773
1204	0.0305691	0.561266	15.6371	11.0187	0.00201777	0.998032
1205	0.0275901	0.571129	14.9452	10.2621	0.00198632	0.992506
1206	0.042591	0.633542	17.6066	11.8573	0.00424331	0.991204
1207	0.052055	0.692608	21.9829	12.9863	0.00826304	0.987025
1208	0.0287792	0.572208	13.7736	7.91567	0.00150519	0.973046
1209	0.0136863	0.439795	10.9854	5.5473	0.000687458	0.92778
1210	0.033403	0.583749	17.473	12.484	0.00228337	0.99585
1211	0.0377069	0.578235	15.9727	10.9535	0.00271402	0.996123
1212	0.0284406	0.623162	16.7961	11.2623	0.0018982	0.998098
1213	0.0425763	0.594674	16.0241	10.1738	0.0028168	0.992873
1214	0.0207389	0.536603	14.7208	9.86337	0.00125416	0.991403
1215	0.0448848	0.634907	15.7806	9.83928	0.00380008	0.997124
1216	0.0169622	0.349684	8.0255	6.43552	0.000836236	0.943529
1217	0.0403192	0.591831	15.559	10.1369	0.00280042	0.994184
1218	0.0239967	0.535926	14.23	9.03222	0.00133622	0.975808
1219	0.0314823	0.590679	15.6458	10.3929	0.00202465	0.997692
1220	0.0571307	0.721694	22.2266	12.8428	0.00848214	0.990489
1221	0.0304791	0.547571	13.6845	9.19188	0.00207219	0.992727
1222	0.0402685	0.59715	16.929	11.7034	0.00362432	0.995129
1223	0.0336766	0.581004	17.0437	11.5984	0.00215185	0.987068
1224	0.0415634	0.627368	15.9362	10.1671	0.00317365	0.99478
1225	0.0413953	0.645982	18.3773	11.7715	0.00310324	0.996102
1226	0.0308863	0.570897	15.4113	10.5828	0.002144	0.991896
1227	0.0384768	0.619199	20.4607	14.2988	0.0029753	0.991663
1228	0.0152935	0.522199	15.5029	8.99832	0.000758033	0.953079
1229	0.0228177	0.538676	14.4555	9.55641	0.00137386	0.986354
1230	0.0384381	0.622145	17.1914	11.3736	0.00283971	0.997667
1231	0.0268086	0.551925	16.2326	12.0177	0.00187527	0.995186
1232	0.025907	0.491042	13.8676	9.67179	0.0014714	0.977883
1233	0.0104649	0.475591	11.3276	3.94796	0.00055939	0.900357
1234	0.0400473	0.616062	18.2138	12.0438	0.00304159	0.996157
1235	0.0545539	0.697243	21.9697	12.8668	0.00778348	0.98564
1236	0.029701	0.572756	15.3361	10.6643	0.00208574	0.997487
1237	0.0255097	0.395492	9.15538	8.21508	0.00125821	0.967235
1238	0.0388752	0.622915	17.2812	11.6491	0.00342104	0.997518
1239	0.0521768	0.677457	20.2448	12.5463	0.00723383	0.965165
1240	0.0121951	0.487286	12.6612	5.3347	0.000622759	0.921435
1241	0.0354851	0.606593	16.6178	11.3594	0.00271579	0.996811
1242	0.0163019	0.533639	14.9703	8.69183	0.000905992	0.966501
1243	0.0273734	0.562986	15.9334	11.0716	0.00171095	0.992741
1244	0.0124299	0.46001	12.592	5.47485	0.000588874	0.934184
1245	0.0293993	0.567385	14.2683	8.59122	0.00165259	0.98102
1246	0.0517372	0.575492	16.3835	11.0298	0.00597853	0.990226
1247	0.0247456	0.498237	12.519	7.83446	0.00132445	0.971588
1248	0.0100641	0.451982	10.4859	3.85948	0.00060379	0.90091
1249	0.0443679	0.556623	15.7178	10.9071	0.00360372	0.997015
1250	0.0245523	0.569534	16.0709	10.6959	0.00139395	0.989958
1251	0.0223505	0.536377	13.2699	8.004	0.00129246	0.976623
1252	0.026007	0.552301	14.7911	10.0122	0.00166938	0.988535
1253	0.0168807	0.353553	6.80588	4.60085	0.000981732	0.937479
1254	0.027284	0.554766	15.5341	11.2941	0.00194041	0.996418
1255	0.0373463	0.575737	15.9737	11.2952	0.00314115	0.997889
1256	0.0362101	0.61871	18.3971	12.5966	0.00268024	0.995302
1257	0.0255691	0.562573	13.1927	7.70849	0.00152724	0.980478
1258	0.0433288	0.71899	22.6055	14.6271	0.00573543	0.963438
1259	0.0314922	0.53147	12.4775	8.20524	0.00214327	0.993174
1260	0.0251836	0.56003	14.5606	9.43731	0.00153221	0.987659
1261	0.0217177	0.412499	10.6667	9.73139	0.00106491	0.981137
1262	0.00605421	0.380056	8.62773	2.2851	0.000343737	0.838741
1263	0.0468765	0.611485	15.7728	9.96989	0.00407336	0.995102
1264	0.0312495	0.628967	16.3805	10.6277	0.00213943	0.994877
1265	0.0100933	0.500668	13.0003	4.95806	0.000558759	0.930087
1266	0.0413981	0.587736	15.7225	10.3483	0.00315566	0.992487
1267	0.036984	0.584782	16.2914	11.0215	0.00267062	0.99114
1268	0.0232296	0.553063	15.7963	11.2516	0.00152045	0.990535
1269	0.014596	0.544933	13.9459	6.6985	0.000816502	0.948301
1270	0.0276064	0.566878	15.9392	10.9138	0.00168401	0.993167
1271	0.056428	0.786895	26.9479	14.4157	0.0165848	0.885758
1272	0.0608119	0.716554	23.7745	12.6579	0.012033	0.982666
1273	0.0328113	0.628571	18.4925	12.4913	0.00222208	0.995371
1274	0.0279421	0.489489	13.1919	8.92638	0.00159507	0.967754
1275	0.0424791	0.622523	19.0938	13.09	0.00361538	0.995664
1276	0.0285418	0.503299	12.5193	8.48103	0.00181179	0.987659
1277	0.0291341	0.563742	15.0578	10.3163	0.00196237	0.994041
1278	0.0488916	0.690043	19.9412	12.5076	0.00576473	0.986894
1279	0.0404811	0.610056	18.2203	12.4444	0.00341955	0.996691
1280	0.0325009	0.544606	14.8984	10.5626	0.00232195	0.994427
1281	0.0424442	0.619739	18.3072	12.6017	0.00410671	0.980618
1282	0.0427248	0.6673	19.4661	12.4148	0.00397988	0.99651
1283	0.0256099	0.544622	12.235	6.70336	0.00142152	0.965894
1284	0.0449086	0.645279	21.3757	14.5627	0.0074714	0.946126
1285	0.0432382	0.621293	18.0034	11.7237	0.00337782	0.993371
1286	0.0147264	0.511499	12.6753	5.45711	0.000698971	0.927128
1287	0.0090246	0.414532	10.236	4.44817	0.000515679	0.917724
1288	0.0203251	0.543655	14.4555	8.71446	0.00111205	0.974019
1289	0.0315137	0.541397	14.1989	10.1158	0.002255	0.997944
1290	0.0269131	0.573976	14.6548	9.27449	0.00155505	0.993789
1291	0.0533786	0.616373	17.3093	10.6878	0.00541693	0.99552
1292	0.0100517	0.46418	11.2578	3.88875	0.00052604	0.892389
1293	0.0273573	0.583504	15.9948	11.177	0.00184177	0.99894
1294	0.0263933	0.602941	18.6676	13.0176	0.00157992	0.986395
1295	0.0146053	0.515764	12.4446	4.93916	0.000667562	0.911774
1296	0.0322522	0.552746	13.7927	8.6311	0.00186034	0.98528
1297	0.0302911	0.592992	16.6799	11.6737	0.00211042	0.995254
1298	0.0223759	0.515914	12.7696	8.52702	0.00151574	0.994787
1299	0.0396406	0.627314	17.4641	11.7819	0.00338159	0.995001
1300	0.00923051	0.47087	11.5954	3.72124	0.000496333	0.890143
1301	0.0359932	0.636243	17.4636	10.9778	0.00229029	0.986733
1302	0.0201119	0.550492	15.4617	10.5899	0.00126323	0.990803
1303	0.0418268	0.580456	17.0135	12.0763	0.00416396	0.993421
1304	0.0286708	0.562912	13.6439	8.74467	0.00191473	0.987935
1305	0.0210621	0.544641	14.9545	9.8792	0.00127329	0.982467
1306	0.0301318	0.57705	15.7461	11.0756	0.00211997	0.997801
1307	0.0163948	0.421951	10.275	7.07744	0.00089262	0.962116
1308	0.0162413	0.521969	15.4687	10.0838	0.000962188	0.968833
1309	0.0649147	0.789411	26.5231	12.9043	0.0156417	0.964433
1310	0.0259968	0.552253	16.2678	11.1218	0.00149184	0.979088
1311	0.0266456	0.617056	16.9222	10.5057	0.00145382	0.983204
1312	0.0259069	0.578843	14.1627	9.22337	0.00180561	0.994406
1313	0.0414233	0.561604	15.3471	10.5777	0.00320724	0.998686
1314	0.0347916	0.608566	15.3872	10.0189	0.00248025	0.997368
1315	0.03141	0.565389	16.7	12.2939	0.00223208	0.995473
1316	0.0187038	0.530908	14.5131	9.17185	0.00109456	0.971959
1317	0.0177296	0.541453	15.8491	9.86087	0.000919833	0.970069
1318	0.0436792	0.576639	16.154	11.0079	0.00374254	0.996836
1319	0.00646511	0.425187	10.4631	2.96293	0.000375595	0.865342
1320	0.0467846	0.612136	17.2917	11.4004	0.00425306	0.996431
1321	0.0459024	0.689496	21.3386	13.7651	0.00671318	0.915351
1322	0.0424291	0.6106	17.0261	11.3748	0.00318126	0.996
1323	0.0212606	0.53899	14.119	9.04674	0.00129443	0.987659
1324	0.0348748	0.597025	16.2184	11.1383	0.0025986	0.995787
1325	0.0548534	0.679733	21.9809	12.8129	0.00771505	0.989236
1326	0.014638	0.50048	11.0825	4.35007	0.000756762	0.910622
1327	0.0464398	0.650161	19.9504	12.7222	0.00499431	0.991672
1328	0.0500225	0.652191	20.7167	12.5362	0.00557935	0.988294
1329	0.0274108	0.551369	13.1722	7.8804	0.00151208	0.980618
1330	0.04846	0.706882	20.9999	12.8977	0.00580442	0.986585
1331	0.0514519	0.685176	19.0081	11.0011	0.00466926	0.993401
1332	0.033069	0.61371	17.389	11.4548	0.00204743	0.996624
1333	0.0427816	0.611744	19.9053	14.2884	0.00544813	0.976395
1334	0.0386376	0.57678	14.6426	9.79324	0.00286591	0.998006
1335	0.0416422	0.603197	14.0279	8.85366	0.00313228	0.996877
1336	0.014359	0.513517	12.2468	5.60447	0.000792896	0.945483
1337	0.0219131	0.532592	13.9452	8.74159	0.00130199	0.979829
1338	0.0267903	0.547123	14.6874	9.63637	0.00159747	0.977717
1339	0.0193964	0.544126	13.5318	7.6326	0.00110161	0.972233
1340	0.0495358	0.598031	15.8102	10.1124	0.00416157	0.997283
1341	0.0478346	0.620359	17.3433	11.2365	0.00479538	0.994528
1342	0.0183593	0.512024	12.6438	6.5826	0.000954299	0.949457
1343	0.0379135	0.58166	15.5502	10.2878	0.00257552	0.995543
1344	0.0548415	0.651991	18.6388	11.1208	0.00612769	0.995651
1345	0.0247896	0.517356	13.6486	8.90873	0.00141758	0.980957
1346	0.0268965	0.565682	13.1898	7.45239	0.00150434	0.970375
1347	0.0327819	0.586803	15.2243	10.3877	0.00241294	0.99514
1348	0.0209455	0.55488	15.4983	10.4678	0.00130457	0.987317
1349	0.0225367	0.581893	14.3846	8.85525	0.00144831	0.990385
1350	0.0313277	0.567095	14.5021	9.41439	0.0019236	0.991789
1351	0.0119845	0.467361	12.6294	5.6453	0.000628495	0.924418
1352	0.0126207	0.483517	12.6748	5.20272	0.000638446	0.940437
1353	0.0595353	0.670488	19.8183	11.2082	0.00715292	0.99541
1354	0.0273758	0.512473	13.2449	8.33695	0.00141021	0.9673
1355	0.03005	0.524629	14.2469	10.7694	0.00227778	0.997287
1356	0.038434	0.663548	18.7041	12.5585	0.00318067	0.9869
1357	0.0382781	0.592237	15.914	10.6093	0.00285846	0.994034
1358	0.0298914	0.477227	13.4073	14.9584	0.00259792	0.995381
1359	0.0178736	0.556792	15.7465	10.2352	0.00110171	0.981076
1360	0.0371439	0.582121	17.6754	13.5003	0.00421252	0.981253
1361	0.0248334	0.526663	13.8414	8.44683	0.00124162	0.965319
1362	0.00583663	0.375885	8.49773	1.85426	0.000339243	0.813884
1363	0.0236616	0.574373	16.8601	12.4224	0.00163372	0.99742
1364	0.0559344	0.794215	27.9612	13.9259	0.0150141	0.985639
1365	0.0453403	0.643162	19.0977	12.3755	0.00425873	0.995128
1366	0.0237451	0.561499	14.1886	8.71945	0.00136076	0.984609
1367	0.0393559	0.614165	17.6618	11.8917	0.00313833	0.996278
1368	0.0113252	0.487304	12.47	5.34905	0.000584652	0.931021
1369	0.0357794	0.581036	13.9909	8.91918	0.00235785	0.994823
1370	0.0332003	0.600397	15.6427	10.2814	0.00230505	0.991507
1371	0.0313279	0.546109	16.5417	12.3364	0.00228992	0.992295
1372	0.0410766	0.615934	15.9486	10.4342	0.00331019	0.997664
1373	0.0251618	0.542043	14.2201	9.14824	0.00145748	0.982294
1374	0.0229734	0.594749	15.5536	9.17577	0.00123053	0.977921
1375	0.0139859	0.500028	12.6777	6.09772	0.000756324	0.942199
1376	0.0374643	0.66523	18.7134	12.3948	0.00311567	0.995441
1377	0.024281	0.524047	14.386	9.71521	0.0014181	0.984301
1378	0.0250478	0.587094	16.598	10.5476	0.00135814	0.971121
1379	0.0243247	0.597057	16.7496	11.5722	0.00156434	0.998072
1380	0.0335224	0.638858	18.496	11.628	0.00186461	0.987743
1381	0.0538054	0.666745	20.1366	11.9843	0.00672268	0.994362
1382	0.0590287	0.686652	20.9174	11.5871	0.0103664	0.992883
1383	0.0208818	0.575391	16.1268	10.739	0.00125297	0.990481
1384	0.0137335	0.4789	12.0214	5.86655	0.00065283	0.95564
1385	0.0881629	0.679165	19.7082	9.47314	0.0259514	0.931064
1386	0.0281395	0.542887	15.8286	11.7311	0.00192783	0.995992
1387	0.0521425	0.708529	21.5093	12.9569	0.00733429	0.971618
1388	0.0487317	0.654367	18.6022	11.5284	0.00395473	0.994975
1389	0.0321811	0.580255	14.2064	9.11948	0.0021075	0.992797
1390	0.0375625	0.604972	19.457	14.1964	0.00352025	0.983464
1391	0.0339194	0.567725	15.4085	10.5698	0.00231415	0.997686
1392	0.04954	0.643115	17.4616	10.8969	0.00450756	0.995728
1393	0.0273178	0.583982	15.4144	10.3393	0.00175977	0.997394
1394	0.0533623	0.664694	20.9973	13.1321	0.00630609	0.983998
1395	0.0344935	0.599547	17.2248	11.4788	0.00233498	0.983184
1396	0.0220206	0.512938	13.3023	8.61946	0.00133913	0.982814
1397	0.051284	0.749081	24.996	13.9476	0.00866914	0.995954
1398	0.00533389	0.424139	11.2512	2.50236	0.000330287	0.843448
1399	0.0192557	0.56775	15.0029	7.40361	0.000935055	0.968852
1400	0.0332284	0.56887	13.7626	9.03018	0.00229036	0.995934
1401	0.043793	0.639914	16.4286	10.1657	0.00325369	0.998641
1402	0.0264271	0.555218	14.065	8.91074	0.00159424	0.981044
1403	0.0633091	0.684476	21.9362	12.2947	0.0112384	0.982678
1404	0.0265213	0.593863	16.4074	11.2137	0.00170418	0.997105
1405	0.0497141	0.598993	17.0969	11.6191	0.00662825	0.97216
1406	0.0173762	0.510775	13.591	8.27078	0.0009942	0.977222
1407	0.0312446	0.590669	17.529	12.7987	0.00232888	0.99468
1408	0.0446704	0.641528	17.7706	11.149	0.00324741	0.991607
1409	0.0251227	0.533833	15.9188	11.6312	0.001586	0.990903
1410	0.0380767	0.5809	17.2529	12.7626	0.00358703	0.987007
1411	0.0289719	0.581575	16.6624	11.8389	0.00198773	0.996396
1412	0.0237163	0.502158	14.0529	9.60769	0.00136127	0.974171
1413	0.0413924	0.603366	16.6626	10.8741	0.00286292	0.998401
1414	0.0529649	0.67199	21.084	12.9679	0.00626541	0.992475
1415	0.0199893	0.477756	12.1602	7.56219	0.00115783	0.965939
1416	0.0356801	0.618057	16.6148	10.6788	0.00238194	0.992343
1417	0.0396623	0.640506	18.9359	12.5425	0.00341245	0.995947
1418	0.0190375	0.429312	9.06566	5.01751	0.000956368	0.923701
1419	0.0165237	0.497144	12.8733	6.78242	0.000807328	0.950002
1420	0.02062	0.531093	14.9331	10.691	0.00138404	0.993581
1421	0.0379365	0.582559	17.1227	12.7047	0.00366667	0.977692
1422	0.0525168	0.681251	20.74	12.669	0.00586649	0.992523
1423	0.050174	0.689887	20.7386	12.4726	0.00534897	0.991074
1424	0.0243258	0.553455	14.2615	9.07813	0.00149529	0.982333
1425	0.0640859	0.65746	19.2449	10.6386	0.00921329	0.995726
1426	0.027904	0.55671	13.969	9.27528	0.00188494	0.991299
1427	0.045924	0.641724	17.5201	11.1963	0.00366812	0.995758
1428	0.0200636	0.543526	13.0948	6.98501	0.00107774	0.964051
1429	0.0202838	0.48897	13.6071	8.57216	0.0010521	0.959451
1430	0.0148944	0.556749	12.3065	5.12724	0.000848772	0.951183
1431	0.00650576	0.400367	9.92365	2.71519	0.000347956	0.840347
1432	0.0360755	0.575662	16.7123	11.3233	0.00246366	0.986187
1433	0.0264594	0.562374	15.1736	10.0146	0.0015447	0.99026
1434	0.0400941	0.602586	15.3939	10.0526	0.00320169	0.99617
1435	0.0126861	0.401498	9.79522	6.10619	0.000672079	0.948539
1436	0.0506768	0.656702	20.2806	12.8513	0.00752838	0.98198
1437	0.0312953	0.540232	12.3813	6.88978	0.00164298	0.974923
1438	0.0146803	0.514019	13.388	6.55971	0.000752657	0.939354
1439	0.0349406	0.563102	15.8666	11.2488	0.00258091	0.996379
1440	0.0547471	0.660729	23.6722	14.4948	0.0166712	0.750685
1441	0.027888	0.55256	15.2531	10.3861	0.00167033	0.992925
1442	0.028857	0.545902	13.7335	8.97857	0.00184566	0.983575
1443	0.0446023	0.61977	14.9632	9.09815	0.00319839	0.994047
1444	0.0473818	0.635087	19.6513	13.0431	0.0060585	0.980837
1445	0.0415923	0.618711	17.7107	11.9338	0.0036763	0.989263
1446	0.0412505	0.588675	16.5541	10.9718	0.00302059	0.991924
1447	0.0452012	0.695789	20.4629	13.1024	0.00576558	0.988559
1448	0.0575276	0.698195	23.1104	13.0231	0.0122581	0.981975
1449	0.00845082	0.456981	11.6996	4.18092	0.000489936	0.915793
1450	0.040672	0.568288	15.9019	11.2255	0.00355683	0.995652
1451	0.0161634	0.525723	12.9775	6.13808	0.00083566	0.937359
1452	0.0298937	0.522716	13.2504	8.74913	0.00175971	0.988462
1453	0.0417983	0.657006	20.9847	13.6784	0.0036524	0.997732
1454	0.0446359	0.681365	22.0118	13.9705	0.0051494	0.990152
1455	0.0560809	0.668466	22.6782	12.8402	0.00816047	0.992677
1456	0.0223109	0.590833	13.4227	6.69076	0.00119068	0.950615
1457	0.0330752	0.593105	16.9519	11.531	0.0022434	0.990576
1458	0.0339358	0.557471	16.5017	11.816	0.00242201	0.995808
1459	0.0409572	0.661642	19.8498	12.8313	0.00336609	0.996337
1460	0.0141294	0.471735	12.8711	5.75743	0.000633624	0.934229
1461	0.0269197	0.589185	19.0243	14.3834	0.00189137	0.994561
1462	0.029916	0.566461	16.3733	11.6703	0.00192644	0.99833
1463	0.0458638	0.60093	16.532	11.0991	0.0046764	0.994437
1464	0.0399816	0.666079	21.4916	14.7841	0.00497388	0.974166
1465	0.0308302	0.586388	16.7174	11.7892	0.0021724	0.995972
1466	0.0522744	0.692565	21.1989	12.6823	0.00801563	0.977041
1467	0.0103462	0.429744	10.9808	5.27062	0.000573987	0.933745
1468	0.0446074	0.652111	19.9852	13.3793	0.00531099	0.981292
1469	0.0401456	0.536152	14.3444	10.0746	0.0030811	0.995865
1470	0.0447942	0.586909	14.1964	9.25212	0.00375746	0.997254
1471	0.0237391	0.52275	14.3921	9.44776	0.00131702	0.980834
1472	0.0379792	0.602974	16.943	11.5584	0.00288548	0.998368
1473	0.0386759	0.576475	15.6761	10.3198	0.00257921	0.989395
1474	0.0354538	0.552205	14.4666	9.74965	0.00236617	0.992521
1475	0.0432255	0.611117	15.513	10.1063	0.00340314	0.994854
1476	0.0432158	0.657107	19.4272	12.7447	0.00381248	0.989589
1477	0.0553263	0.700257	21.3991	12.7873	0.0108667	0.911124
1478	0.0363057	0.63855	17.7618	11.5022	0.00246337	0.995069
1479	0.0235804	0.525486	15.1543	10.7053	0.00142274	0.986672
1480	0.0348694	0.594876	16.2137	11.4916	0.00283258	0.994708
1481	0.0352354	0.532355	13.3089	8.96437	0.00228304	0.995037
1482	0.0272603	0.555093	14.1098	8.35597	0.0014828	0.980381
1483	0.0139983	0.487765	12.5349	6.33384	0.000787992	0.944822
1484	0.0506285	0.68793	20.4698	12.7165	0.00786463	0.982572
1485	0.00586561	0.476017	11.3847	1.84418	0.000343092	0.818598
1486	0.00510636	0.38576	8.70532	1.23537	0.000303143	0.803592
1487	0.0290498	0.560964	16.2091	11.5119	0.00183296	0.992136
1488	0.0394584	0.656595	18.3433	12.1497	0.00354078	0.9951
1489	0.0252529	0.551609	12.0348	6.09988	0.00130762	0.944121
1490	0.0364969	0.65255	20.9103	14.7157	0.00342136	0.992814
1491	0.0244122	0.541436	12.441	7.45889	0.00150346	0.982639
1492	0.0306891	0.549622	16.1159	11.4861	0.00194487	0.995357
1493	0.0476322	0.683917	21.8416	13.8204	0.00583265	0.978541
1494	0.0346409	0.577348	12.8461	7.77076	0.0022244	0.989697
1495	0.0377742	0.621446	16.9281	11.8807	0.00365348	0.994734
1496	0.0212353	0.532108	12.4884	7.20402	0.0012273	0.980205
1497	0.00918523	0.522811	14.1382	4.76615	0.000472311	0.920351
1498	0.0179564	0.530661	13.025	6.57762	0.00091873	0.954099
1499	0.0274984	0.521199	12.794	7.98677	0.00156466	0.972002
1500	0.0422028	0.690559	20.5139	13.639	0.00472355	0.954671
1501	0.0416416	0.586661	15.4245	10.6749	0.00390174	0.996035
1502	0.0422776	0.671417	20.7877	13.1983	0.00338558	0.993879
1503	0.0159277	0.540994	14.2237	7.58079	0.000868466	0.962789
1504	0.0338119	0.556697	14.2069	10.1435	0.00204215	0.99346
1505	0.0451531	0.609869	17.1358	10.7536	0.00332397	0.986738
1506	0.0365721	0.637247	20.0212	14.3112	0.00361078	0.988771
1507	0.0130213	0.448105	10.4118	4.79099	0.000704616	0.917474
1508	0.0583605	0.755377	25.612	13.9913	0.0120994	0.971619
1509	0.0618093	0.705252	24.6936	12.8433	0.0105304	0.976825
1510	0.021736	0.505821	12.5919	7.69979	0.00125199	0.973896
1511	0.0159816	0.519204	14.1581	8.17182	0.000879497	0.969535
1512	0.0272948	0.531165	14.4077	10.1577	0.00179539	0.993474
1513	0.0302387	0.581887	15.257	10.0765	0.00193091	0.994595
1514	0.0342563	0.57158	15.4875	10.5443	0.00232979	0.994854
1515	0.0462593	0.591749	14.7858	9.43859	0.00338315	0.991805
1516	0.0116403	0.485487	11.0039	4.19531	0.000721495	0.914868
1517	0.0110586	0.360598	7.97689	4.52534	0.000606083	0.938783
1518	0.0444556	0.617055	19.8055	13.298	0.00482832	0.994828
1519	0.0384701	0.558226	15.5001	10.2841	0.00251858	0.978438
1520	0.0272563	0.600393	16.1877	10.8792	0.00180375	0.99339
1521	0.0481096	0.692463	21.0153	13.1232	0.00662235	0.973013
1522	0.0326614	0.612874	17.1972	12.0084	0.00248119	0.997088
1523	0.0414509	0.596363	17.8209	12.1486	0.00355559	0.99325
1524	0.0432839	0.592051	18.1516	12.9525	0.00431358	0.991928
1525	0.034985	0.613343	15.1058	9.50276	0.00244615	0.988761
1526	0.0383795	0.59541	16.0075	10.9064	0.003026	0.998415
1527	0.0299669	0.506051	13.8302	9.93549	0.001908	0.992685
1528	0.0226174	0.356641	6.95715	5.70225	0.00120671	0.964318
1529	0.0351972	0.614874	15.7099	10.1403	0.0025415	0.992216
1530	0.0354565	0.616847	17.5722	11.7195	0.00237792	0.984935
1531	0.0277374	0.55074	13.2129	7.90359	0.00157657	0.976305
1532	0.0483648	0.630886	16.6413	10.7404	0.00475554	0.991712
1533	0.0460916	0.685041	20.7489	13.202	0.00513467	0.992461
1534	0.0300259	0.62467	15.7008	8.96188	0.00159146	0.968124
1535	0.0289777	0.564948	18.3061	13.3439	0.00174222	0.994325
1536	0.00823513	0.408838	9.63851	3.62589	0.0004444	0.896037
1537	0.0538957	0.605723	17.7685	11.5289	0.00738356	0.986947
1538	0.0328614	0.596115	16.6873	11.7135	0.00257797	0.994247
1539	0.0287948	0.499331	14.4373	10.3337	0.00165523	0.983622
1540	0.046996	0.639624	22.5994	14.8956	0.00827153	0.93988
1541	0.0451587	0.62243	18.9049	12.5326	0.00407653	0.992065
1542	0.0400872	0.623472	16.5837	11.1262	0.00346813	0.994592
1543	0.0242002	0.556514	15.9968	11.1987	0.00148247	0.992946
1544	0.0503997	0.625613	17.8722	11.4675	0.00536395	0.992395
1545	0.021246	0.569959	13.5341	7.68543	0.00124061	0.982668
1546	0.0315353	0.555155	15.3439	10.9228	0.00222496	0.996694
1547	0.0423658	0.547241	17.316	12.5474	0.00367907	0.998314
1548	0.0308512	0.565878	14.9811	10.2988	0.00210747	0.99552
1549	0.0119048	0.372155	8.14411	4.17886	0.000622133	0.910435
1550	0.055565	0.699353	21.2383	12.2045	0.00794479	0.99552
1551	0.0423857	0.643485	18.6366	12.0239	0.00337443	0.995586
1552	0.0404371	0.611532	17.2618	11.6044	0.00320053	0.99708
1553	0.0144586	0.472629	12.4604	5.77273	0.00072784	0.951136
1554	0.0152966	0.559064	15.3419	7.86922	0.000728451	0.952843
1555	0.0343594	0.604196	17.4384	12.3993	0.00273129	0.9967
1556	0.0346533	0.578354	15.6862	10.2892	0.00220326	0.983799
1557	0.0335965	0.564163	15.767	10.9517	0.00232356	0.993429
1558	0.0314335	0.549027	13.7316	9.13885	0.00205135	0.994552
1559	0.0430422	0.696301	20.8941	13.1817	0.00371668	0.986051
1560	0.0174412	0.506066	14.17	8.17861	0.000881989	0.950609
1561	0.0206432	0.513542	14.2381	9.99002	0.00131092	0.991827
1562	0.0341224	0.558848	14.5358	9.916	0.00232011	0.997044
1563	0.0119839	0.532179	14.1617	6.8584	0.000699776	0.957648
1564	0.0202897	0.535114	14.4241	8.97804	0.00118311	0.973472
1565	0.0145085	0.47402	11.7816	5.94501	0.000822656	0.946908
1566	0.0580819	0.666794	19.489	11.345	0.00777837	0.99191
1567	0.0313783	0.567767	15.1456	10.1687	0.00197874	0.99499
1568	0.0229043	0.504694	12.7678	7.95108	0.00134123	0.965926
1569	0.0512724	0.630638	17.76	11.5946	0.00640492	0.971067
1570	0.0265514	0.549765	14.5464	9.75528	0.00164942	0.992407
1571	0.0322589	0.551153	15.0214	10.4577	0.00215365	0.9956
1572	0.0250123	0.599318	17.4379	11.8894	0.00146584	0.996168
1573	0.0571626	0.72074	22.6246	12.6243	0.0104244	0.986676
1574	0.0268459	0.617283	17.2961	11.0733	0.00155481	0.978429
1575	0.0219042	0.498424	13.8249	9.35238	0.00123784	0.981194
1576	0.036594	0.587576	15.6353	10.6366	0.00271028	0.995628
1577	0.0167023	0.425131	11.1308	10.3846	0.00104605	0.983696
1578	0.0376177	0.612448	17.9162	12.6167	0.00326893	0.993686
1579	0.0219459	0.500556	13.9639	9.08092	0.00113335	0.97526
1580	0.0189541	0.39514	8.25203	5.76161	0.000944336	0.948596
1581	0.0203124	0.562729	12.6225	5.82327	0.00100115	0.941792
1582	0.0317611	0.569518	15.4218	10.1247	0.00187323	0.988451
1583	0.0550922	0.705411	22.252	13.2779	0.0115877	0.926848
1584	0.0421128	0.609348	17.9449	12.0888	0.00347885	0.994905
1585	0.0267349	0.567899	15.126	10.0916	0.00168362	0.990008
1586	0.0389345	0.550247	15.5306	10.4872	0.00242534	0.980061
1587	0.0354982	0.602098	15.2957	9.69262	0.00227652	0.992227
1588	0.0338634	0.638958	19.2168	13.4173	0.00261098	0.995708
1589	0.0216022	0.525709	15.5418	11.3574	0.00139115	0.983559
1590	0.0135271	0.529994	14.0315	7.25429	0.000747784	0.963626
1591	0.0231078	0.501991	11.1356	6.2039	0.00129705	0.963559
1592	0.0335088	0.562335	16.6841	12.4953	0.00285614	0.997097
1593	0.0071	0.442344	10.7001	3.238	0.000440745	0.874649
1594	0.00845344	0.401789	10.0815	4.0772	0.000488536	0.897939
1595	0.0205156	0.556243	15.7388	10.7816	0.00124019	0.996878
1596	0.0207887	0.503452	11.8617	6.81077	0.00122694	0.968084
1597	0.0474285	0.608487	18.2845	12.2821	0.00596498	0.99243
1598	0.0444546	0.694774	21.7341	13.817	0.00565334	0.988874
1599	0.0193045	0.518753	13.3658	7.83442	0.00106728	0.968963
1600	0.0519221	0.694587	21.7515	13.0142	0.00556768	0.992128
1601	0.0220695	0.559665	16.5454	12.1105	0.00143306	0.997395
1602	0.0533292	0.658753	17.1993	10.3836	0.00473262	0.993266
1603	0.0144013	0.438587	10.5797	6.069	0.000834876	0.946557
1604	0.0399954	0.626112	17.9738	11.8947	0.00318673	0.996626
1605	0.0327066	0.606373	15.5256	9.8956	0.00204454	0.996067
1606	0.0309445	0.548317	13.919	9.27621	0.00197568	0.992827
1607	0.0216856	0.572339	16.0626	10.3029	0.00118975	0.98568
1608	0.0405786	0.613869	17.902	12.1023	0.00355955	0.994917
1609	0.0640913	0.68861	21.2972	11.537	0.0109453	0.98561
1610	0.0149253	0.478502	12.7389	7.73859	0.000960232	0.975762
1611	0.023557	0.341712	7.1798	5.92067	0.00116166	0.970494
1612	0.0377845	0.642776	18.5309	12.5895	0.00335768	0.989497
1613	0.0331981	0.535251	14.3438	10.0459	0.0022559	0.994912
1614	0.0474408	0.68573	19.564	12.4011	0.00583082	0.987687
1615	0.0397207	0.611889	16.3433	11.2663	0.0036203	0.996041
1616	0.0251903	0.577412	16.3366	10.616	0.00139824	0.984905
1617	0.0484628	0.713914	22.6689	13.6517	0.0070449	0.993507
1618	0.0491835	0.672221	19.35	11.5463	0.00457704	0.99019
1619	0.0206674	0.5398	13.4114	7.42403	0.00108086	0.962638
1620	0.0216095	0.513676	11.893	6.68546	0.00119348	0.962766
1621	0.0284182	0.57364	16.3858	11.2729	0.00174239	0.992938
1622	0.0341552	0.583803	15.7845	11.0477	0.00269997	0.997521
1623	0.0442719	0.664708	18.5644	11.9145	0.00465055	0.995963
1624	0.0364287	0.631822	14.5608	8.84416	0.00260411	0.991841
1625	0.0196199	0.533502	14.6946	9.51741	0.00115255	0.983192
1626	0.00868011	0.447352	11.9415	4.70433	0.000523851	0.922745
1627	0.0193225	0.550355	15.6439	10.7071	0.00121632	0.989249
1628	0.0202287	0.532143	13.5435	7.97271	0.00107958	0.974134
1629	0.0285428	0.536428	14.8585	10.4653	0.00194539	0.983625
1630	0.055425	0.69816	23.199	13.1928	0.00891499	0.991211
1631	0.0547936	0.582331	14.9223	9.3344	0.00472497	0.996206
1632	0.017774	0.506897	11.2496	5.42181	0.000960736	0.944466
1633	0.0321017	0.592115	16.9166	11.9822	0.00234859	0.997863
1634	0.0251107	0.529226	13.9002	8.96847	0.00140865	0.982865
1635	0.0128293	0.42913	10.5938	5.997	0.00064524	0.938578
1636	0.00591371	0.418315	11.3527	3.10261	0.000301657	0.87203
1637	0.0364165	0.617528	18.3003	12.7996	0.00327309	0.988693
1638	0.0336186	0.54545	14.7324	10.4744	0.00240011	0.996095
1639	0.0194216	0.527311	15.5622	10.8219	0.00113155	0.989345
1640	0.0556669	0.684208	19.8279	11.2079	0.00561474	0.997668
1641	0.0237863	0.550141	15.8608	11.5543	0.00164594	0.989637
1642	0.0394295	0.540157	15.2616	10.9556	0.00294637	0.99696
1643	0.0517022	0.670097	20.5136	12.8766	0.00725422	0.976577
1644	0.0280569	0.565964	13.3453	8.10926	0.00170797	0.985669
1645	0.0434644	0.629233	18.6445	12.878	0.00487537	0.976574
1646	0.0644936	0.742201	23.5159	12.5248	0.0150495	0.984013
1647	0.0234203	0.539223	14.9637	10.2873	0.00142692	0.990153
1648	0.00989738	0.510223	13.3653	4.80191	0.000528669	0.921166
1649	0.00725611	0.375744	8.03912	2.46211	0.000386394	0.832815
1650	0.0568256	0.681233	20.5274	12.0102	0.0096581	0.986475
1651	0.0154271	0.505304	14.2902	8.86262	0.000883774	0.976392
1652	0.0390522	0.649469	17.7838	11.6843	0.00301144	0.997167
1653	0.0406058	0.612536	16.0726	10.2892	0.00284022	0.993963
1654	0.0176655	0.567581	15.0541	8.45037	0.000939851	0.969342
1655	0.010097	0.56137	15.4751	5.83285	0.000506742	0.929108
1656	0.0545181	0.700746	22.0024	13.1682	0.0105945	0.928922
1657	0.00842308	0.397	9.08592	3.50486	0.000417069	0.900132
1658	0.0104116	0.497971	13.3461	5.81039	0.000616756	0.94642
1659	0.0235961	0.527103	14.4965	9.55477	0.00131832	0.981601
1660	0.0391043	0.564816	13.8507	9.11456	0.00286742	0.993328
1661	0.017575	0.527662	15.3226	10.0342	0.00103657	0.969328
1662	0.0464237	0.679339	20.5005	13.0945	0.00508785	0.979819
1663	0.026758	0.511923	14.6074	10.7815	0.00170131	0.996017
1664	0.0248772	0.51262	14.9552	15.0172	0.00196261	0.995515
1665	0.0122754	0.405332	9.61021	5.15988	0.000597603	0.922045
1666	0.0463899	0.649255	16.4467	10.2029	0.00407435	0.998115
1667	0.0378868	0.481591	11.4665	7.78064	0.00225796	0.986488
1668	0.0468271	0.672867	19.456	12.0889	0.00478613	0.993231
1669	0.0198625	0.551995	14.414	8.50693	0.00106939	0.976532
1670	0.0224957	0.530001	13.3732	6.99671	0.001082	0.969274
1671	0.0365845	0.644638	17.7226	11.9841	0.00316681	0.997466
1672	0.0414712	0.600836	18.6354	12.6444	0.00361308	0.988419
1673	0.0236634	0.522388	13.84	9.58522	0.00159914	0.985511
1674	0.040949	0.69009	19.5837	12.299	0.00330452	0.9964
1675	0.0103613	0.411802	9.50755	4.04897	0.000533389	0.907634
1676	0.028175	0.530788	12.3667	7.08016	0.00149037	0.961555
1677	0.0160488	0.552133	15.1219	7.143	0.000747955	0.961477
1678	0.0527638	0.646054	18.5613	11.1982	0.00490181	0.997589
1679	0.0177263	0.530333	13.7807	6.6787	0.000858504	0.964811
1680	0.0604075	0.70387	22.373	12.0365	0.010166	0.969651
1681	0.0494373	0.585551	16.9029	11.1814	0.00477902	0.994505
1682	0.0308938	0.647504	19.1262	12.8992	0.00210877	0.993817
1683	0.00893546	0.484748	10.4369	3.01838	0.000517832	0.866999
1684	0.0377239	0.587833	16.4461	11.1172	0.00263344	0.99297
1685	0.0366203	0.646867	17.9648	11.4314	0.00243035	0.990522
1686	0.0184038	0.361572	8.21889	7.49319	0.00109104	0.976881
1687	0.0417216	0.662665	20.3308	13.3393	0.00415879	0.989323
1688	0.035739	0.579484	14.86	9.4539	0.00217249	0.989757
1689	0.0197145	0.49157	10.7137	5.70239	0.00119353	0.953068
1690	0.0179147	0.513075	13.7315	8.24967	0.000996207	0.96688
1691	0.0069433	0.423814	10.5602	3.21508	0.000363455	0.879561
1692	0.0427133	0.613206	18.8115	12.8546	0.00478541	0.996539
1693	0.0383212	0.609932	15.7298	10.4068	0.0030116	0.997632
1694	0.0394147	0.581475	16.2066	11.2216	0.00313788	0.996522
1695	0.0173277	0.495194	11.7582	5.95406	0.000901759	0.949985
1696	0.0491931	0.582562	15.1928	10.3128	0.00507037	0.985297
1697	0.057669	0.75519	24.4107	13.1458	0.0103383	0.982655
1698	0.00753927	0.439188	10.7259	2.46276	0.000362604	0.804894
1699	0.0313793	0.559216	13.446	7.86097	0.0016625	0.979459
1700	0.0365871	0.579802	15.6822	10.6456	0.00265405	0.996426
1701	0.0371063	0.581046	16.536	12.1828	0.00349257	0.988644
1702	0.0402449	0.596204	16.1486	10.535	0.00271878	0.986819
1703	0.0496582	0.673352	20.1897	12.2665	0.00534863	0.992854
1704	0.0332082	0.553276	16.0225	11.7961	0.00257141	0.995874
1705	0.0183331	0.541944	14.2849	8.43252	0.00104592	0.974964
1706	0.0348598	0.566542	15.1977	10.2897	0.00247334	0.987199
1707	0.0515327	0.646894	18.4038	11.2676	0.00519571	0.997343
1708	0.0421993	0.625265	18.1247	12.3901	0.00464098	0.990916
1709	0.0304182	0.565356	15.9168	11.1691	0.00202862	0.995204
1710	0.0413434	0.577926	15.1748	9.84404	0.00285646	0.98973
1711	0.0197852	0.52459	13.5973	8.19065	0.00109807	0.977773
1712	0.0367858	0.564671	16.3086	11.9775	0.00330945	0.996063
1713	0.0135738	0.419993	10.3866	6.89264	0.000774175	0.965949
1714	0.0206526	0.517735	13.1131	7.86902	0.00117395	0.977216
1715	0.0164597	0.372567	7.63648	4.80185	0.000864219	0.931481
1716	0.0288266	0.553556	15.1553	10.1876	0.0017441	0.985592
1717	0.0145844	0.515793	14.3684	8.18603	0.000818918	0.969762
1718	0.0164397	0.470798	12.2501	6.07062	0.000807842	0.95299
1719	0.0309344	0.581563	15.1757	10.4535	0.00225038	0.997615
1720	0.0185774	0.552441	15.0513	9.15505	0.00102868	0.982263
1721	0.018072	0.525025	13.7816	8.23805	0.0010432	0.974273
1722	0.027696	0.577922	15.1309	9.52415	0.00156677	0.986226
1723	0.0441488	0.654358	19.7676	12.953	0.00453687	0.99368
1724	0.0594121	0.72545	23.2474	13.0922	0.0183528	0.824394
1725	0.0179359	0.487637	12.1632	6.54487	0.000947021	0.948587
1726	0.0154136	0.546115	14.3383	7.79255	0.000879405	0.972438
1727	0.0333062	0.639997	17.9121	11.936	0.00231573	0.995547
1728	0.0348981	0.608237	16.9469	11.481	0.00256944	0.995071
1729	0.0220236	0.527309	14.055	8.70354	0.00117581	0.969836
1730	0.048595	0.668723	20.099	12.9625	0.0062117	0.947353
1731	0.00653029	0.415457	10.2317	3.36631	0.000399245	0.893713
1732	0.0452519	0.599528	15.8426	10.0776	0.00303208	0.993246
1733	0.03324	0.620014	17.0092	11.3681	0.00229957	0.996683
1734	0.0273032	0.540602	14.1658	9.72117	0.00180861	0.988311
1735	0.00501058	0.404527	10.0738	1.75353	0.000280681	0.835607
1736	0.04293	0.630632	18.3259	12.2724	0.00429133	0.994976
1737	0.0436327	0.567368	14.4809	9.5155	0.0032542	0.994007
1738	0.0287949	0.585963	17.5156	11.9352	0.00170193	0.984396
1739	0.0205852	0.533138	14.9904	10.1736	0.00124426	0.987451
1740	0.0187397	0.539738	14.7349	9.32745	0.00108661	0.983729
1741	0.0162677	0.49004	12.4364	6.59274	0.000888139	0.949455
1742	0.0189531	0.530958	14.4401	8.8039	0.00106845	0.971865
1743	0.0131972	0.417315	10.1606	6.13769	0.000692731	0.945484
1744	0.0181719	0.503119	13.007	7.69451	0.00103843	0.972064
1745	0.0243839	0.437435	10.5081	7.85831	0.00131851	0.965792
1746	0.0511921	0.625647	20.0971	13.4848	0.0100824	0.88498
1747	0.00791586	0.386445	8.2113	2.89107	0.000456343	0.848704
1748	0.0546043	0.564793	14.582	9.53018	0.00593581	0.996053
1749	0.0331225	0.564169	17.1035	12.0526	0.00199192	0.991559
1750	0.0235678	0.533511	15.7144	10.7685	0.00128256	0.984518
1751	0.0239312	0.532013	13.1966	8.36733	0.00143154	0.987025
1752	0.011458	0.498641	13.2742	5.65993	0.000614862	0.934398
1753	0.0213656	0.564851	14.9572	9.87224	0.00137842	0.992526
1754	0.0271807	0.512119	14.5947	10.8076	0.0018567	0.991223
1755	0.0333598	0.552373	15.8137	11.2907	0.00221128	0.993748
1756	0.0484699	0.638243	18.2537	11.8547	0.00615512	0.988285
1757	0.0293062	0.560318	15.5374	11.0564	0.0020465	0.997081
1758	0.0292377	0.588622	14.3573	8.85634	0.0018364	0.978381
1759	0.0306524	0.574787	14.9075	9.99832	0.00205049	0.991345
1760	0.0561208	0.749761	24.4266	13.5092	0.00907662	0.956081
1761	0.0375483	0.631521	19.0294	12.4785	0.00248881	0.991034
1762	0.00699181	0.427183	9.69937	3.31954	0.000466851	0.909977
1763	0.0390413	0.578076	15.6812	10.5676	0.00280899	0.996115
1764	0.0311425	0.522618	13.2037	9.0873	0.00205176	0.995676
1765	0.0195348	0.561173	15.6585	10.4197	0.00122039	0.989118
1766	0.0636123	0.652068	19.2305	11.2507	0.0101299	0.972625
1767	0.0661986	0.567471	13.7991	8.32687	0.00623892	0.996352
1768	0.0194082	0.522368	12.8509	7.86051	0.00127245	0.98199
1769	0.0386073	0.579797	15.3438	10.6915	0.00308002	0.995043
1770	0.0609285	0.735316	23.7114	12.2191	0.00941346	0.977695
1771	0.0429562	0.650081	17.6467	11.1797	0.00334514	0.995559
1772	0.0150188	0.457484	11.8116	6.85824	0.000798147	0.945066
1773	0.0164681	0.531981	14.0071	7.91178	0.000958523	0.967402
1774	0.042043	0.642101	16.6843	10.2816	0.00289223	0.998595
1775	0.0450537	0.624728	21.1288	14.3971	0.00599388	0.98719
1776	0.0606043	0.680783	20.7424	11.7807	0.0132934	0.923654
1777	0.0525065	0.709129	22.6974	13.2871	0.00804313	0.987638
1778	0.0225556	0.535738	15.1359	10.242	0.00127515	0.987472
1779	0.0273396	0.548689	15.084	10.366	0.00169506	0.993155
1780	0.0292551	0.575543	15.9629	11.2799	0.00203709	0.997351
1781	0.0430226	0.570462	14.605	9.97651	0.00342413	0.995433
1782	0.0250437	0.580931	16.9524	12.519	0.00174461	0.999128
1783	0.0538943	0.719376	23.0362	13.5511	0.00990998	0.968494
1784	0.0426161	0.654921	18.362	12.2704	0.00427106	0.987714
1785	0.0234192	0.510506	14.2862	10.081	0.00144104	0.987633
1786	0.0439058	0.62562	19.6946	13.5658	0.00530121	0.987586
1787	0.0192207	0.517971	12.2724	6.84992	0.00118647	0.973344
1788	0.00983838	0.366571	7.20354	3.11004	0.000514559	0.856439
1789	0.0257117	0.554977	14.4421	8.94421	0.00138095	0.979638
1790	0.0489596	0.626801	18.163	11.6031	0.00432041	0.995759
1791	0.0372118	0.580759	17.5671	12.2709	0.00255246	0.998171
1792	0.0365063	0.604476	16.1171	11.6085	0.00345994	0.973284
1793	0.0584526	0.664425	20.1284	11.5063	0.0087826	0.982198
1794	0.0123566	0.339643	7.17317	4.49937	0.000716454	0.941179
1795	0.0484614	0.606066	14.9015	9.45967	0.00430823	0.996044
1796	0.0286505	0.584924	16.7449	11.6659	0.00188641	0.993506
1797	0.0170472	0.545916	15.1687	7.50932	0.000784253	0.961932
1798	0.0481893	0.765643	24.7111	13.9297	0.00634497	0.986298
1799	0.0182433	0.493973	12.2686	6.75389	0.000991102	0.956218
1800	0.0324885	0.670779	20.7782	14.689	0.00286273	0.996185
1801	0.0277866	0.550055	17.4244	13.121	0.00181651	0.99531
1802	0.0111601	0.404241	9.39322	5.07676	0.000644826	0.94103
1803	0.0499826	0.626011	15.2911	8.9917	0.00357363	0.987146
1804	0.018503	0.557141	13.4868	6.63498	0.000921137	0.955685
1805	0.0184826	0.52713	13.7028	8.17422	0.00107912	0.975922
1806	0.0304764	0.58565	16.0715	10.5951	0.00187468	0.984369
1807	0.0287199	0.507266	12.298	8.02478	0.00178195	0.985299
1808	0.0418869	0.632896	16.9989	10.8641	0.00323473	0.996511
1809	0.0278053	0.550725	13.113	7.85683	0.00156142	0.982085
1810	0.00989259	0.340535	8.02677	4.39573	0.000522429	0.929984
1811	0.00941718	0.37663	8.37012	3.48412	0.000447774	0.883852
1812	0.0202323	0.552311	16.4549	11.8822	0.00128374	0.993308
1813	0.0367928	0.612764	17.4694	11.7154	0.00254972	0.998786
1814	0.0395653	0.589826	17.1709	12.114	0.00358108	0.998251
1815	0.0219201	0.523591	12.4711	6.62289	0.00108803	0.942566
1816	0.0498557	0.718263	22.1693	13.2437	0.00664719	0.988988
1817	0.0456344	0.661852	19.5298	12.3738	0.00453151	0.993179
1818	0.0482743	0.666338	18.7751	12.0508	0.00626837	0.985284
1819	0.0321776	0.581676	15.6961	11.0072	0.00233986	0.997111
1820	0.0384531	0.592639	12.9647	7.64443	0.00247112	0.988396
1821	0.0291851	0.543323	12.4369	7.47854	0.00178082	0.979073
1822	0.0100246	0.52977	13.6793	5.31212	0.000590575	0.93454
1823	0.0268997	0.547411	14.8287	10.1309	0.00171471	0.987118
1824	0.0231598	0.570729	14.4335	8.67137	0.00130153	0.985112
1825	0.0235166	0.560025	12.5971	6.48353	0.00119856	0.957949
1826	0.0543158	0.622561	16.5951	10.4774	0.00696631	0.996136
1827	0.0282376	0.516908	13.9866	9.99446	0.00184638	0.995306
1828	0.048588	0.654626	20.0026	12.3104	0.00469572	0.982889
1829	0.0305578	0.572566	13.8694	8.92963	0.0020032	0.995902
1830	0.0574134	0.710576	21.8103	12.5877	0.0115585	0.922754
1831	0.0364582	0.589035	13.3117	8.0639	0.0023801	0.990284
1832	0.0357762	0.573302	16.3873	12.0308	0.00291819	0.992576
1833	0.0296802	0.563953	13.6246	8.27802	0.00175173	0.9764
1834	0.034215	0.630308	18.7896	13.1299	0.00281973	0.993359
1835	0.0347314	0.621086	16.2505	10.6656	0.00254984	0.992318
1836	0.0366953	0.637542	16.3283	11.0073	0.0030829	0.995264
1837	0.02647	0.528419	13.8105	9.58301	0.00179211	0.991467
1838	0.0277659	0.508159	11.622	7.19606	0.00161065	0.981734
1839	0.00638842	0.3632	9.64306	3.71703	0.000323339	0.904003
1840	0.0306669	0.575708	17.7196	13.6547	0.00254634	0.994905
1841	0.00663939	0.39513	10.036	2.75994	0.000324655	0.839155
1842	0.0316661	0.544164	13.9058	9.17173	0.00194194	0.990478
1843	0.0149219	0.545103	14.6592	7.8525	0.00079433	0.964702
1844	0.061096	0.723267	22.5993	12.1478	0.00957547	0.985581
1845	0.0129262	0.476722	11.6097	5.18992	0.000733345	0.9319
1846	0.025023	0.540433	14.9033	10.4235	0.00159754	0.994237
1847	0.0254677	0.560912	16.9111	12.3026	0.00160812	0.995007
1848	0.0223983	0.556772	13.8939	8.07366	0.00128503	0.973413
1849	0.0265333	0.559076	15.8468	10.8532	0.00162719	0.984501
1850	0.0403109	0.60881	16.7942	10.8295	0.00281433	0.990619
1851	0.0343835	0.606605	18.1237	12.4971	0.00243568	0.993313
1852	0.0160908	0.499206	13.3956	7.63752	0.000877683	0.964737
1853	0.0602777	0.722382	23.4508	12.6152	0.0107218	0.984607
1854	0.0373041	0.61932	18.0532	12.5522	0.00307054	0.996294
1855	0.0166214	0.53125	13.318	6.52628	0.00084001	0.950258
1856	0.0174177	0.523724	15.3104	10.4541	0.00100584	0.991459
1857	0.0283895	0.561879	14.7508	9.75114	0.00184016	0.97852
1858	0.0294404	0.52176	15.1286	11.4916	0.0020977	0.998393
1859	0.0400386	0.552473	13.4324	8.67123	0.00269011	0.987556
1860	0.0614657	0.704924	21.2188	11.3824	0.0119004	0.993216
1861	0.0352629	0.586825	13.6548	8.34419	0.00224765	0.989842
1862	0.0516599	0.686207	22.9096	13.9045	0.00943063	0.90464
1863	0.0218067	0.536556	14.3416	8.59362	0.00115497	0.968323
1864	0.030483	0.531489	13.5336	8.578	0.00168623	0.975176
1865	0.0252043	0.598631	16.8588	11.3002	0.00151695	0.993996
1866	0.0362207	0.61756	15.6891	9.8016	0.00245995	0.984027
1867	0.0355463	0.532242	14.0504	9.3632	0.00214726	0.984731
1868	0.0068276	0.483538	12.9293	3.37201	0.000377201	0.882611
1869	0.0383324	0.576562	14.8868	9.81935	0.00254429	0.998011
1870	0.0352799	0.587761	14.7498	9.1967	0.00216509	0.985631
1871	0.0408882	0.657457	19.1753	12.9427	0.00403734	0.991628
1872	0.0202059	0.493279	11.2283	6.60593	0.00116284	0.959711
1873	0.0531279	0.69237	22.1152	13.4777	0.00873019	0.986571
1874	0.00886919	0.506106	13.6518	5.23956	0.000531631	0.930031
1875	0.0119482	0.363659	7.46568	4.0333	0.000646481	0.899318
1876	0.0256871	0.539254	15.4485	11.2352	0.00167869	0.996838
1877	0.0339428	0.578935	14.6288	9.50304	0.00227974	0.991247
1878	0.051399	0.665653	20.53	12.5637	0.00739597	0.984094
1879	0.0228912	0.508258	14.2472	9.95269	0.00143617	0.975734
1880	0.0400993	0.60249	15.2433	9.58407	0.00275625	0.989737
1881	0.0190246	0.552082	15.288	9.91285	0.0011646	0.983963
1882	0.0291783	0.527109	12.9855	8.40885	0.00183394	0.977659
1883	0.0098987	0.487026	10.4926	3.4785	0.0005824	0.895828
1884	0.00942693	0.460112	8.99564	2.24	0.000465898	0.790292
1885	0.0382103	0.66355	20.8788	14.1265	0.00345866	0.992779
1886	0.0231715	0.561148	17.0647	12.6183	0.00148639	0.996894
1887	0.0381737	0.564351	15.5897	10.7855	0.00280113	0.995554
1888	0.0386802	0.586839	15.2719	10.1284	0.00288506	0.991508
1889	0.0204514	0.515305	11.91	6.55966	0.00116946	0.963304
1890	0.0151963	0.535686	13.3411	5.70221	0.000740975	0.954608
1891	0.0241353	0.528928	11.4826	5.97587	0.00128544	0.94895
1892	0.0343526	0.547519	14.5378	9.89852	0.00225824	0.991775
1893	0.0207374	0.399263	8.58044	6.57586	0.00114466	0.961297
1894	0.0193659	0.576587	14.3885	7.99913	0.00108374	0.974482
1895	0.0326462	0.606346	15.949	10.4542	0.00222748	0.989927
1896	0.0438617	0.60755	16.4862	10.5235	0.00325198	0.996269
1897	0.0297297	0.614389	16.5164	10.6947	0.0018361	0.993994
1898	0.0330619	0.557366	14.636	9.93213	0.00220896	0.99337
1899	0.035578	0.62856	19.91	14.0257	0.00309155	0.998169
1900	0.0360091	0.588865	15.1813	9.96082	0.00246753	0.993924
1901	0.0497734	0.736463	23.5672	13.5318	0.00656943	0.985364
1902	0.0322316	0.581026	13.6134	8.23321	0.00190347	0.989272
1903	0.0451639	0.627684	17.2383	11.1427	0.00395854	0.994096
1904	0.0231209	0.542894	16.05	11.7474	0.00148573	0.993189
1905	0.0311659	0.480028	11.6363	7.51592	0.00169747	0.965515
1906	0.0145441	0.490013	11.6926	5.07438	0.000769262	0.920832
1907	0.0250908	0.529943	13.8472	8.86133	0.00145594	0.980123
1908	0.0240146	0.560555	15.9489	11.8699	0.00174432	0.995004
1909	0.0476601	0.697653	20.3834	12.9144	0.00569834	0.979122
1910	0.0241632	0.570041	14.4137	8.96328	0.00141912	0.98881
1911	0.00936311	0.492951	12.546	4.0262	0.000477886	0.902393
1912	0.0314188	0.592928	16.0127	10.3162	0.0017797	0.994897
1913	0.0378064	0.595485	16.1765	11.0619	0.00300473	0.993211
1914	0.0476681	0.649779	18.6159	11.6746	0.0045969	0.995946
1915	0.00645813	0.438956	11.6771	3.69543	0.000388378	0.903124
1916	0.0273701	0.583391	18.118	13.5118	0.00183937	0.996668
1917	0.0183338	0.546882	14.5999	8.36549	0.000989584	0.965724
1918	0.0308338	0.563492	15.1613	10.7752	0.00223338	0.998394
1919	0.0506028	0.689625	21.9672	13.858	0.00985536	0.922085
1920	0.0385451	0.662536	20.6188	14.1118	0.00391427	0.993681
1921	0.040228	0.625799	19.5444	13.6265	0.00405906	0.986195
1922	0.0351446	0.587229	16.2334	11.3921	0.00265843	0.996637
1923	0.0506279	0.679667	20.5877	12.3758	0.00503259	0.990149
1924	0.0428832	0.62004	18.0895	12.1087	0.00407848	0.996912
1925	0.0392607	0.594383	16.59	11.6149	0.00341302	0.997032
1926	0.0602834	0.700458	21.3791	12.005	0.0115324	0.949394
1927	0.0294164	0.545213	14.0772	8.61135	0.00153389	0.968119
1928	0.0270871	0.603182	15.7977	10.2553	0.00171492	0.99194
1929	0.0255646	0.555812	15.6109	10.4525	0.00147712	0.982686
1930	0.0294195	0.56249	14.3668	9.69758	0.00202811	0.994068
1931	0.0193406	0.538289	14.8467	9.31663	0.00112039	0.969868
1932	0.0148901	0.522603	13.8299	8.44248	0.00082368	0.962171
1933	0.0514736	0.682009	20.953	12.831	0.00675966	0.921971
1934	0.0163293	0.557065	15.1364	8.33942	0.000864322	0.959928
1935	0.030353	0.60344	20.9451	16.539	0.00250209	0.978933
1936	0.0266105	0.566166	14.8717	9.44408	0.0015351	0.977727
1937	0.0400962	0.560354	15.3658	10.4758	0.00278335	0.985702
1938	0.0104182	0.345673	7.17376	3.97453	0.000615904	0.925833
1939	0.0209596	0.556328	14.6527	8.31733	0.00108742	0.978672
1940	0.034597	0.625559	17.3597	11.2271	0.00216797	0.988036
1941	0.0452974	0.639864	17.8958	12.0204	0.00419347	0.982808
1942	0.0088069	0.502709	12.6501	3.71484	0.000451165	0.895301
1943	0.0331495	0.600473	16.637	11.422	0.00241618	0.997124
1944	0.043622	0.69365	19.9062	12.4006	0.00394208	0.996007
1945	0.0112664	0.504676	12.905	5.4605	0.000655227	0.942505
1946	0.0358448	0.646988	20.2034	13.4135	0.00254762	0.988261
1947	0.0299367	0.539887	14.9122	9.85715	0.00166607	0.974778
1948	0.0102514	0.549034	16.1837	7.05319	0.000499033	0.943469
1949	0.0256801	0.495502	12.3908	7.6046	0.00138961	0.955173
1950	0.0275237	0.547761	15.2668	10.8789	0.00184057	0.995538
1951	0.0365848	0.575552	15.1375	9.78631	0.00232462	0.985305
1952	0.0266241	0.560107	13.314	7.65058	0.00138488	0.973588
1953	0.0408795	0.608523	18.6907	13.1811	0.00413516	0.993412
1954	0.0547863	0.72422	24.0057	13.5325	0.00991387	0.981837
1955	0.00515984	0.458733	12.3779	2.43868	0.000304962	0.85712
1956	0.0167405	0.536152	15.6277	9.61069	0.000900311	0.967253
1957	0.0171292	0.517438	12.6923	6.53238	0.000922891	0.951731
1958	0.016432	0.505348	12.5823	5.61159	0.000773409	0.946061
1959	0.0292384	0.512433	12.004	7.18865	0.00154126	0.964272
1960	0.0256826	0.567399	13.852	8.76878	0.00163094	0.994202
1961	0.0196125	0.510431	13.9568	9.03768	0.00117505	0.97742
1962	0.0303826	0.585343	15.8221	11.1532	0.00221713	0.996973
1963	0.0378775	0.665434	16.8021	10.6384	0.00285611	0.997404
1964	0.0358274	0.620685	17.8787	12.4717	0.00296951	0.997535
1965	0.0408538	0.580591	15.4841	10.6592	0.00349567	0.997828
1966	0.00572946	0.418501	9.20757	1.64344	0.000343752	0.81289
1967	0.0444459	0.629059	15.4611	9.60923	0.00356437	0.994439
1968	0.0216601	0.577294	15.0235	9.70292	0.00136065	0.994201
1969	0.0485704	0.668163	20.8012	13.0124	0.00670715	0.994288
1970	0.0195332	0.516444	15.0851	10.2525	0.00111952	0.977969
1971	0.0526617	0.647099	21.0464	13.3222	0.00855943	0.975138
1972	0.0455054	0.641536	20.2492	13.2253	0.00417746	0.986634
1973	0.00543879	0.420014	10.2718	1.4873	0.000299652	0.80058
1974	0.0218135	0.513658	14.1379	9.39899	0.00124454	0.981299
1975	0.0342912	0.590663	17.0994	12.4428	0.00296141	0.992398
1976	0.0448951	0.663581	19.8075	12.7273	0.00459047	0.99425
1977	0.030836	0.596771	16.2866	10.7129	0.00192634	0.990491
1978	0.0355695	0.594345	16.3781	11.2094	0.00259523	0.996265
1979	0.0156902	0.487406	12.682	7.19993	0.000907569	0.962565
1980	0.032868	0.564209	15.8614	10.5244	0.00198199	0.979804
1981	0.0294216	0.538603	15.1353	11.0069	0.00198858	0.994343
1982	0.0332192	0.555044	16.6291	12.1628	0.00242963	0.99584
1983	0.0271389	0.522259	13.3428	8.39288	0.00150436	0.974381
1984	0.060051	0.612145	19.1405	11.3569	0.00812467	0.992575
1985	0.0397693	0.63889	19.9635	13.4452	0.00344612	0.994434
1986	0.0580679	0.718373	21.6082	12.2878	0.00741411	0.985681
1987	0.021767	0.524056	13.128	8.2041	0.00130876	0.982682
1988	0.0375937	0.678719	18.7147	11.7746	0.00260375	0.99859
1989	0.0246641	0.56501	15.0824	10.3406	0.00161968	0.994875
1990	0.0199474	0.503065	11.9449	6.36068	0.00106616	0.942143
1991	0.0469808	0.637478	18.89	12.4297	0.00455858	0.990448
1992	0.0281969	0.602701	18.1331	12.9693	0.0019881	0.993137
1993	0.0444305	0.645419	18.4916	11.9461	0.00426779	0.992847
1994	0.0609768	0.613657	18.2211	10.866	0.00950827	0.993437
1995	0.00970514	0.453763	12.0599	4.57419	0.000521526	0.909363
1996	0.0252446	0.502909	13.9525	9.77297	0.00153719	0.979834
1997	0.0373775	0.584746	15.6401	10.7312	0.00286132	0.998813
1998	0.0186301	0.516498	12.5782	6.19343	0.00091067	0.938519
[truncated: 1,002 more rows]
